# Supplementary material for: Electrochemical synthesis of diverse sulfonamide derivatives depending on the potential electrode and their antimicrobial activity evaluation
Source: Royal Society of Chemistry journal article supplement (doi:10.1039/c7nj01188a), 2017-01-01

## Supporting Information

### Electrochemical synthesis of diverse sulfonamide derivatives depending on the potential electrode and their antimicrobial evaluation

**F. Varmaghani<sup>\*a,b</sup>, M. Hassan<sup>c</sup>, D. Nematollahi<sup>d</sup> and S. Mallakpour<sup>e</sup>**

*<sup>a</sup>Department of Chemistry, Institute for Advanced Studies in Basic Sciences (IASBS), Zanjan 45137-66731, Iran.*

*<sup>b</sup>Center for Research in Contemporary Basic Sciences and Technologies (CRCBST), Institute for Advanced Studies in Basic Sciences (IASBS), Zanjan 45137-66731, Iran*

*<sup>c</sup>Zanjan Pharmaceutical Biotechnology Research Center, University of Medical Sciences, Zanjan, Iran*

*<sup>d</sup>Faculty of Chemistry, Bu-Ali-Sina University, P. O. Box 65174, Hamedan, Iran*

*<sup>e</sup>Organic Polymer Chemistry Research Laboratory, Department of Chemistry, Isfahan University of Technology, Isfahan 84156-83111, Iran*

[f.varmaghani@iasbs.ac.ir](mailto:f.varmaghani@iasbs.ac.ir)

## Table of Contents:

|                                                     |         |
|-----------------------------------------------------|---------|
| 1. $^1\text{H}$ NMR spectrum of <b>2a</b> .....     | Page 4  |
| 2. $^{13}\text{C}$ NMR spectrum of <b>2a</b> .....  | Page 6  |
| 3. $^1\text{H}$ NMR spectrum of <b>2b</b> .....     | Page 7  |
| 4. $^{13}\text{C}$ NMR spectrum of <b>2b</b> .....  | Page 9  |
| 5. $^1\text{H}$ NMR spectrum of <b>2c</b> .....     | Page 10 |
| 6. $^{13}\text{C}$ NMR spectrum of <b>2c</b> .....  | Page 12 |
| 7. $^1\text{H}$ NMR spectrum of <b>2d</b> .....     | Page 13 |
| 8. $^{13}\text{C}$ NMR spectrum of <b>2d</b> .....  | Page 15 |
| 9. $^1\text{H}$ NMR spectrum of <b>2e</b> .....     | Page 16 |
| 10. $^{13}\text{C}$ NMR spectrum of <b>2e</b> ..... | Page 18 |
| 11. $^1\text{H}$ NMR spectrum of <b>2f</b> .....    | Page 19 |
| 12. $^{13}\text{C}$ NMR spectrum of <b>2f</b> ..... | Page 21 |
| 13. $^1\text{H}$ NMR spectrum of <b>2g</b> .....    | Page 22 |

|                                                     |         |
|-----------------------------------------------------|---------|
| 14. $^{13}\text{C}$ NMR spectrum of <b>2g</b> ..... | Page 25 |
| 15. $^1\text{H}$ NMR spectrum of <b>2h</b> .....    | Page 26 |
| 16. $^{13}\text{C}$ NMR spectrum of <b>2h</b> ..... | Page 29 |
| 17. $^1\text{H}$ NMR spectrum of <b>2i</b> .....    | Page 30 |
| 18. $^{13}\text{C}$ NMR spectrum of <b>2i</b> ..... | Page 33 |

# 1. <sup>1</sup>H NMR spectrum of **2a**

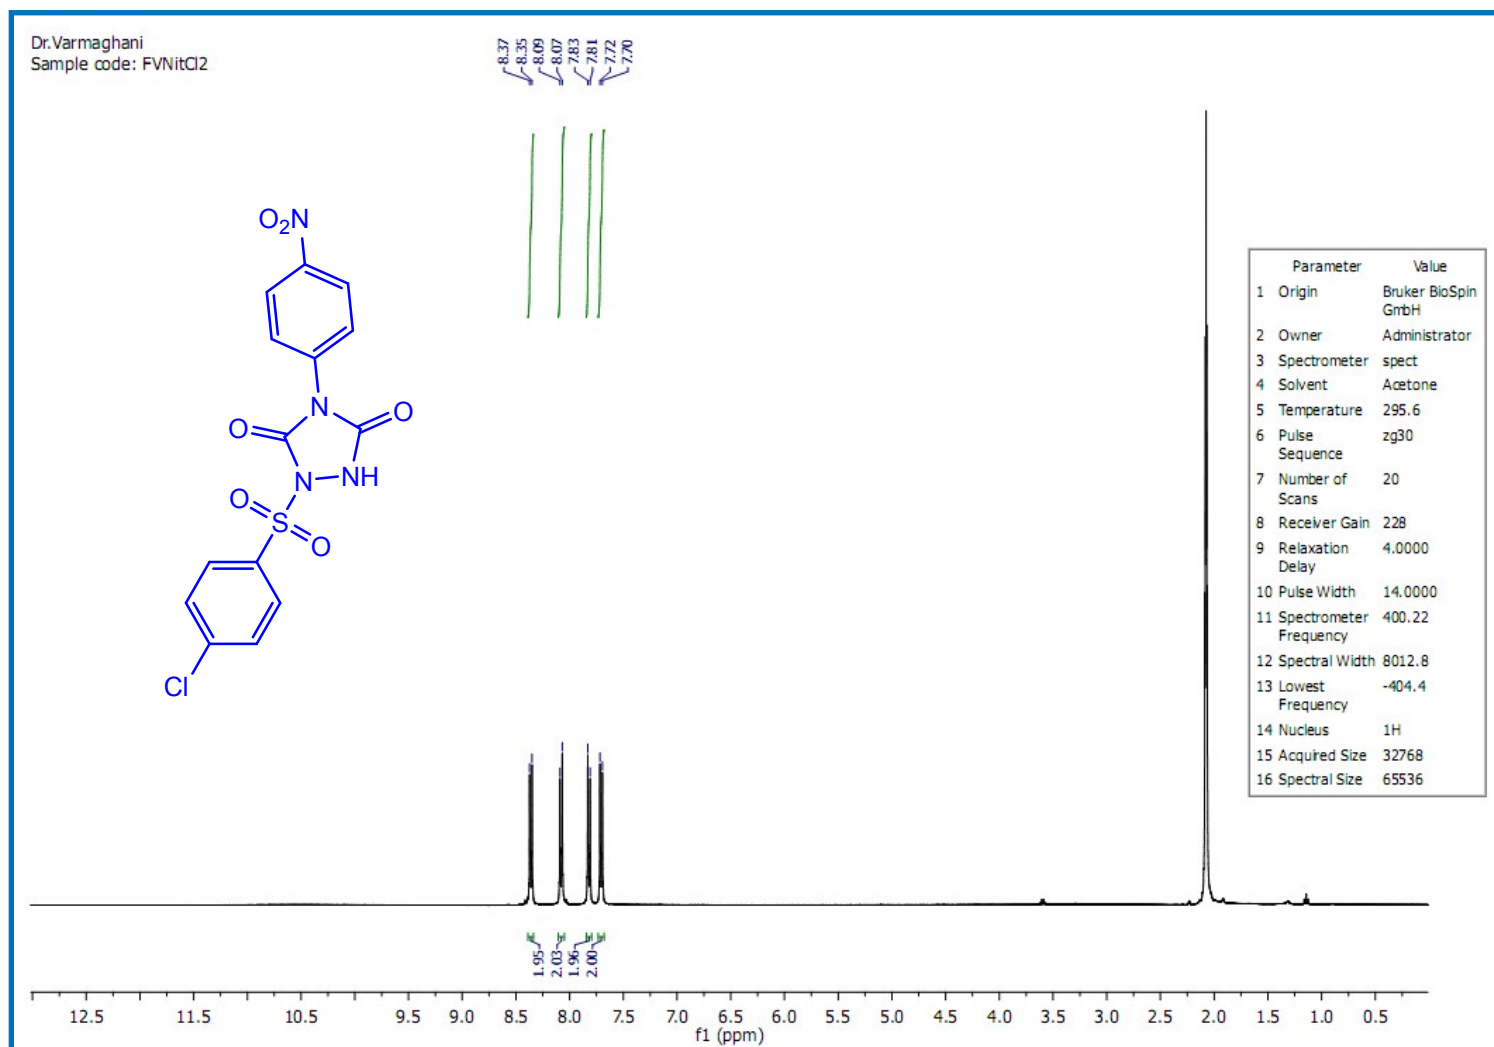

Dr.Varmaghani  
Sample code: FVNitCl2

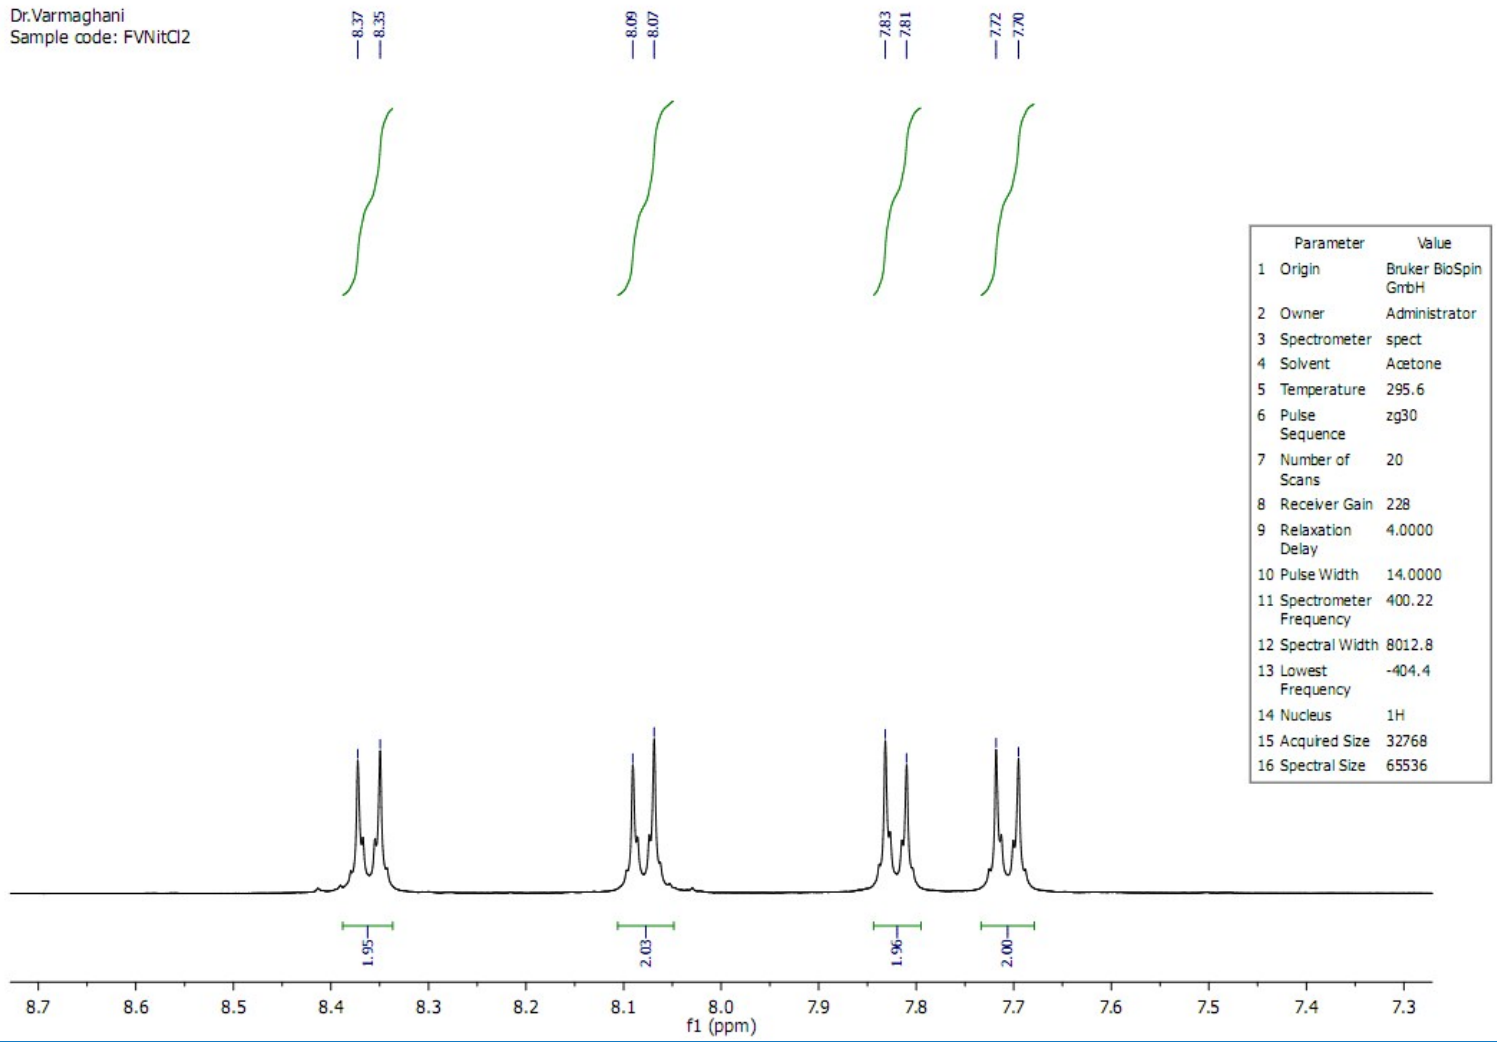

## 2. <sup>13</sup>C NMR spectrum of **2a**

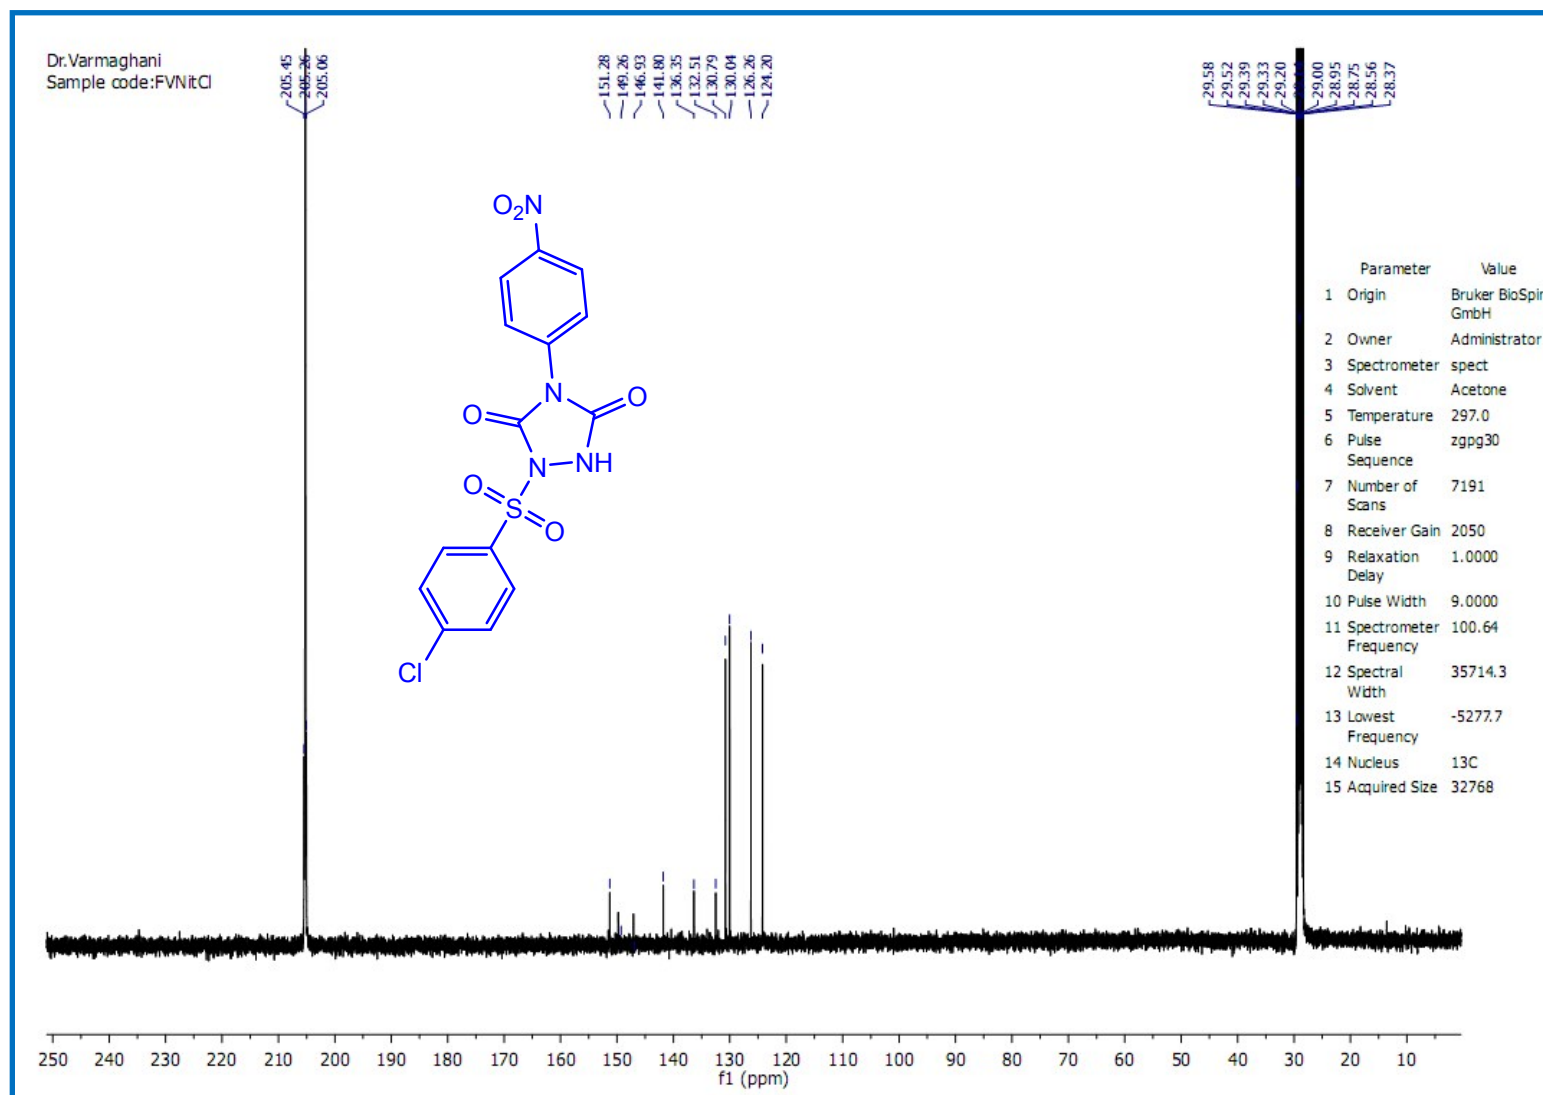

### 3. $^1\text{H}$ NMR spectrum of **2b**

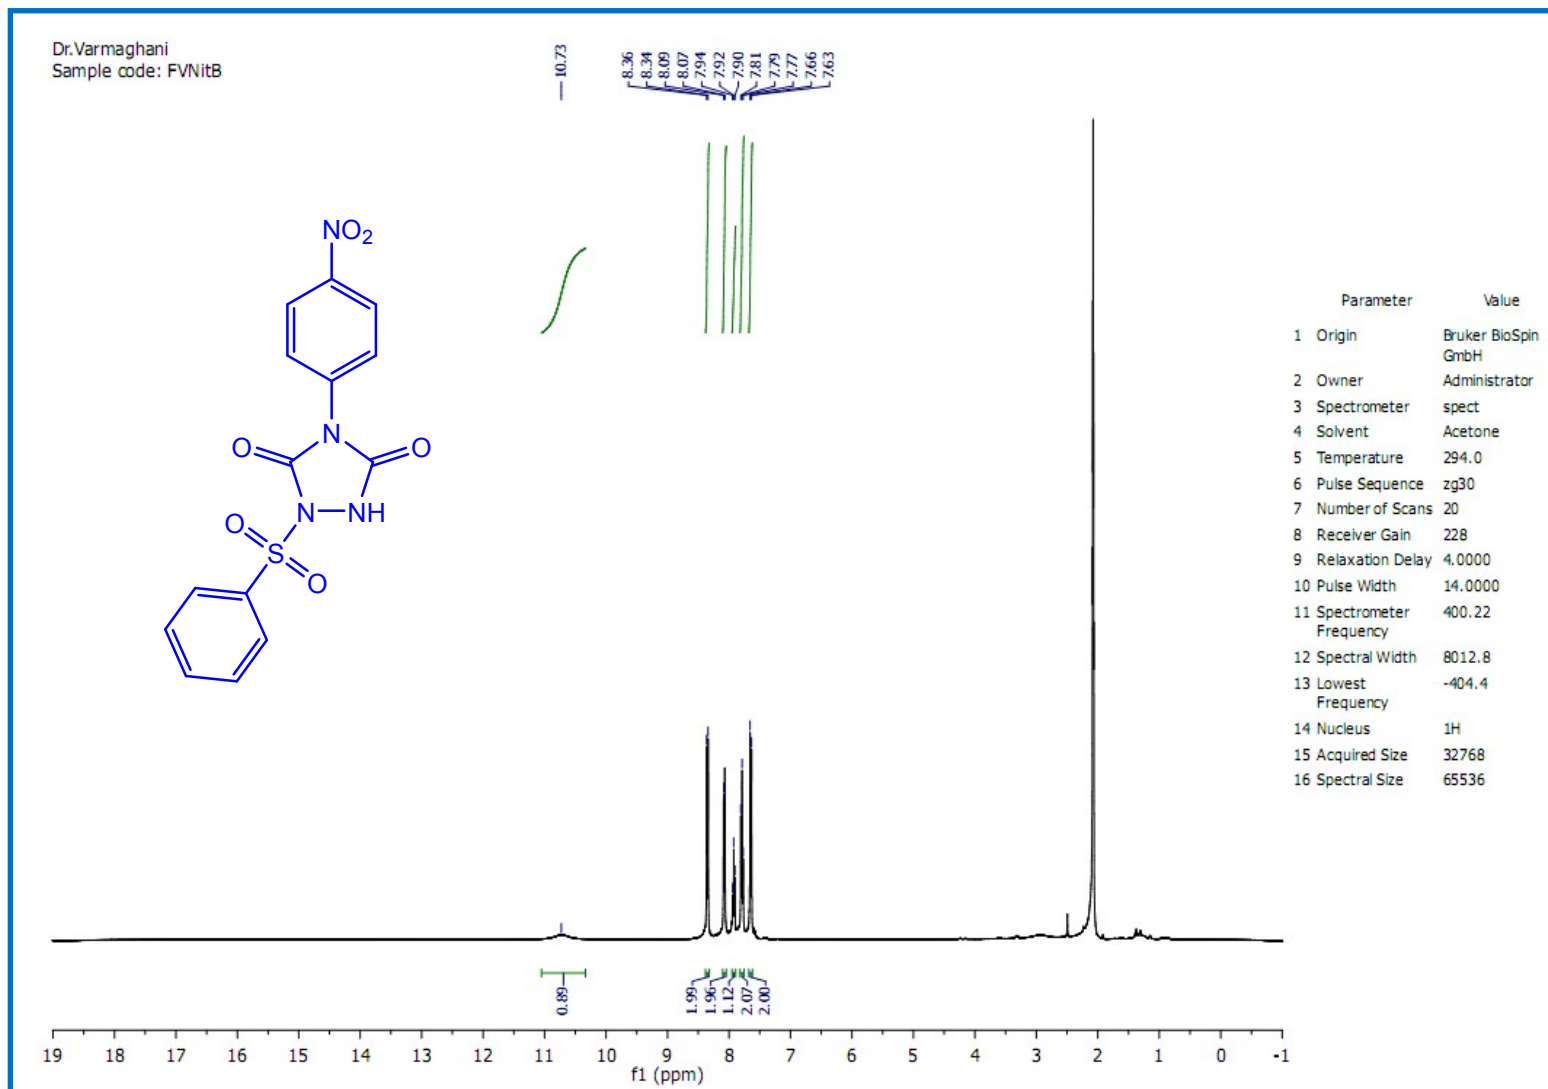

Dr.Varmaghani  
Sample code: FVNiTB

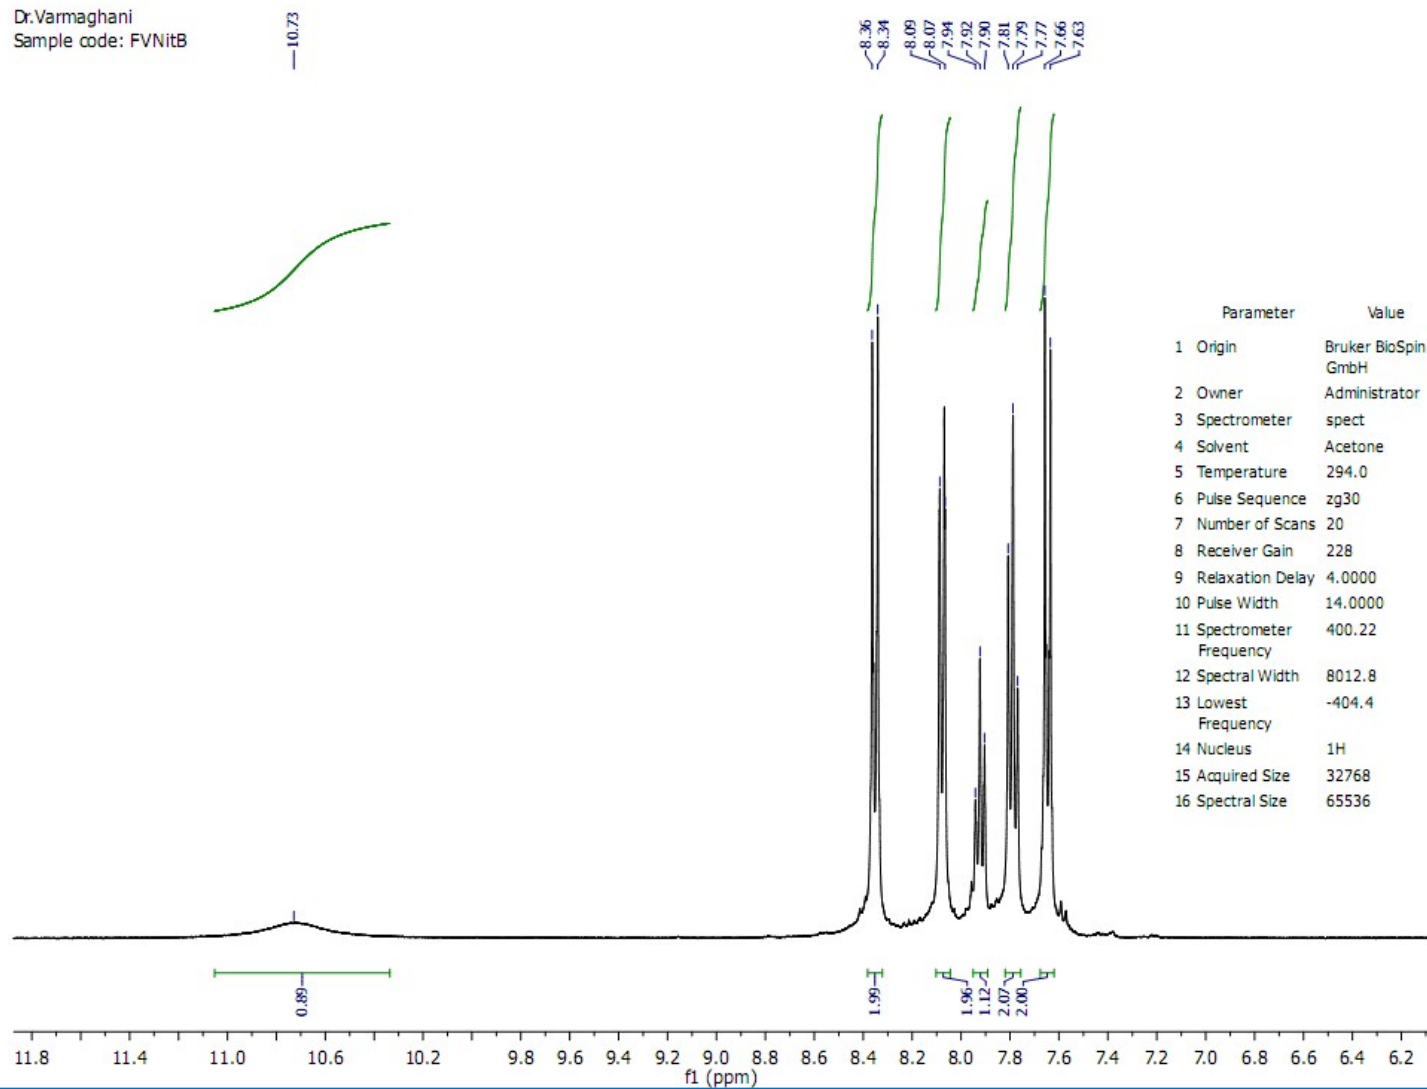



#### 4. <sup>13</sup>C NMR spectrum of **2b**

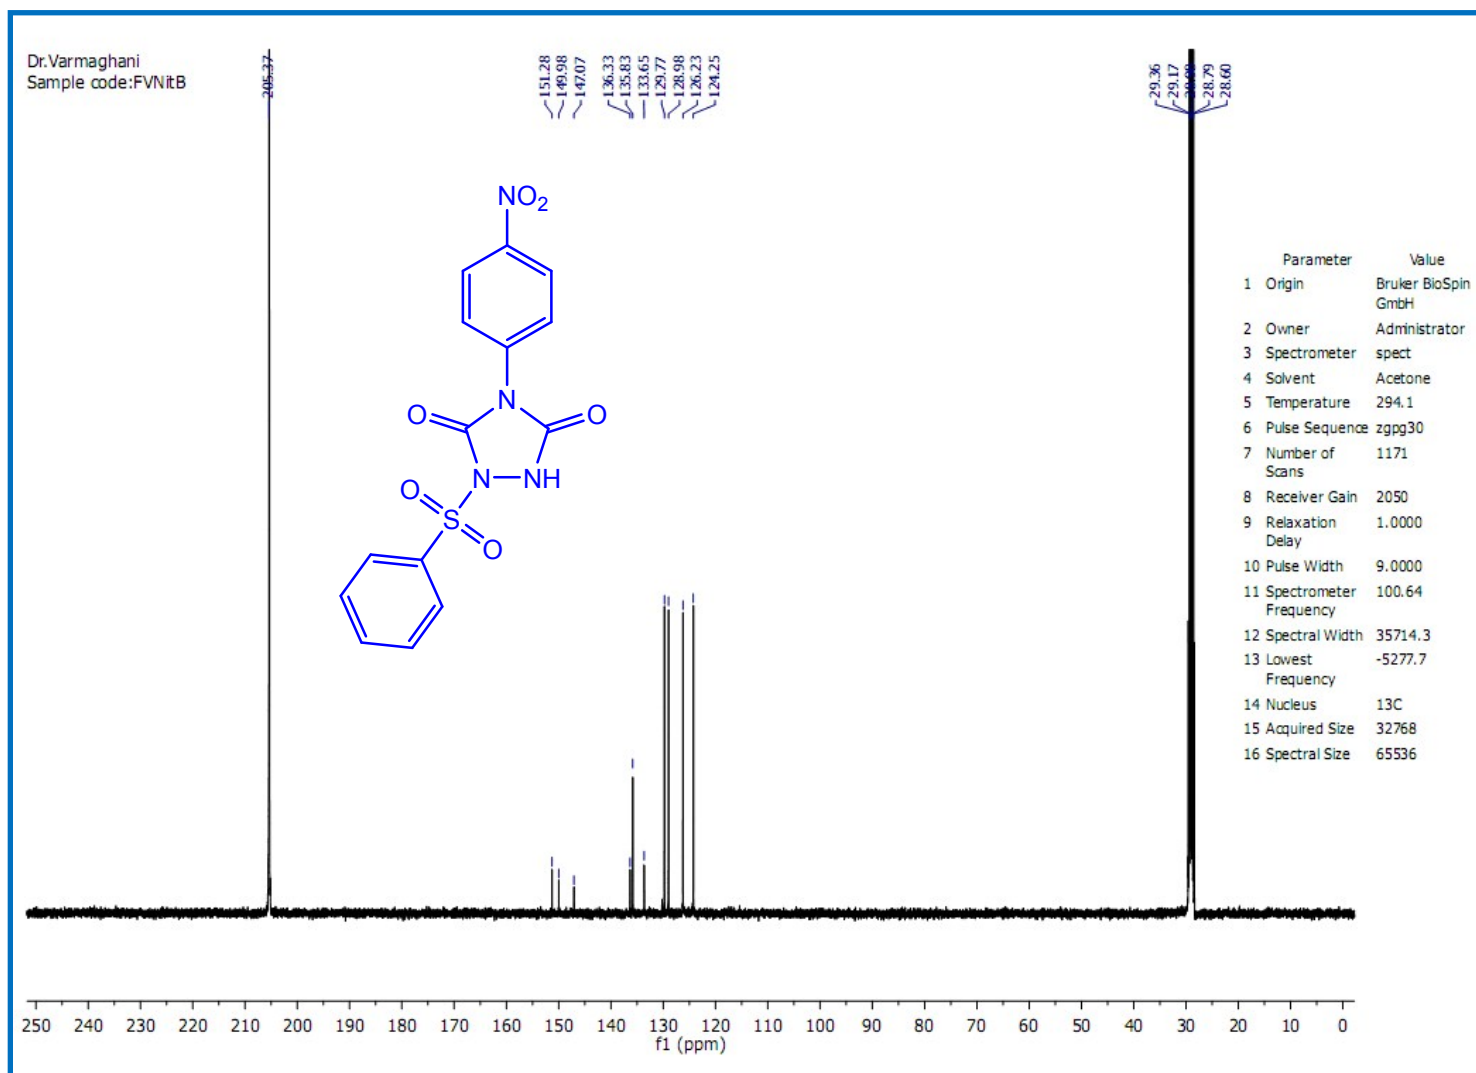

5.  $^1\text{H}$  NMR spectrum of **2c**

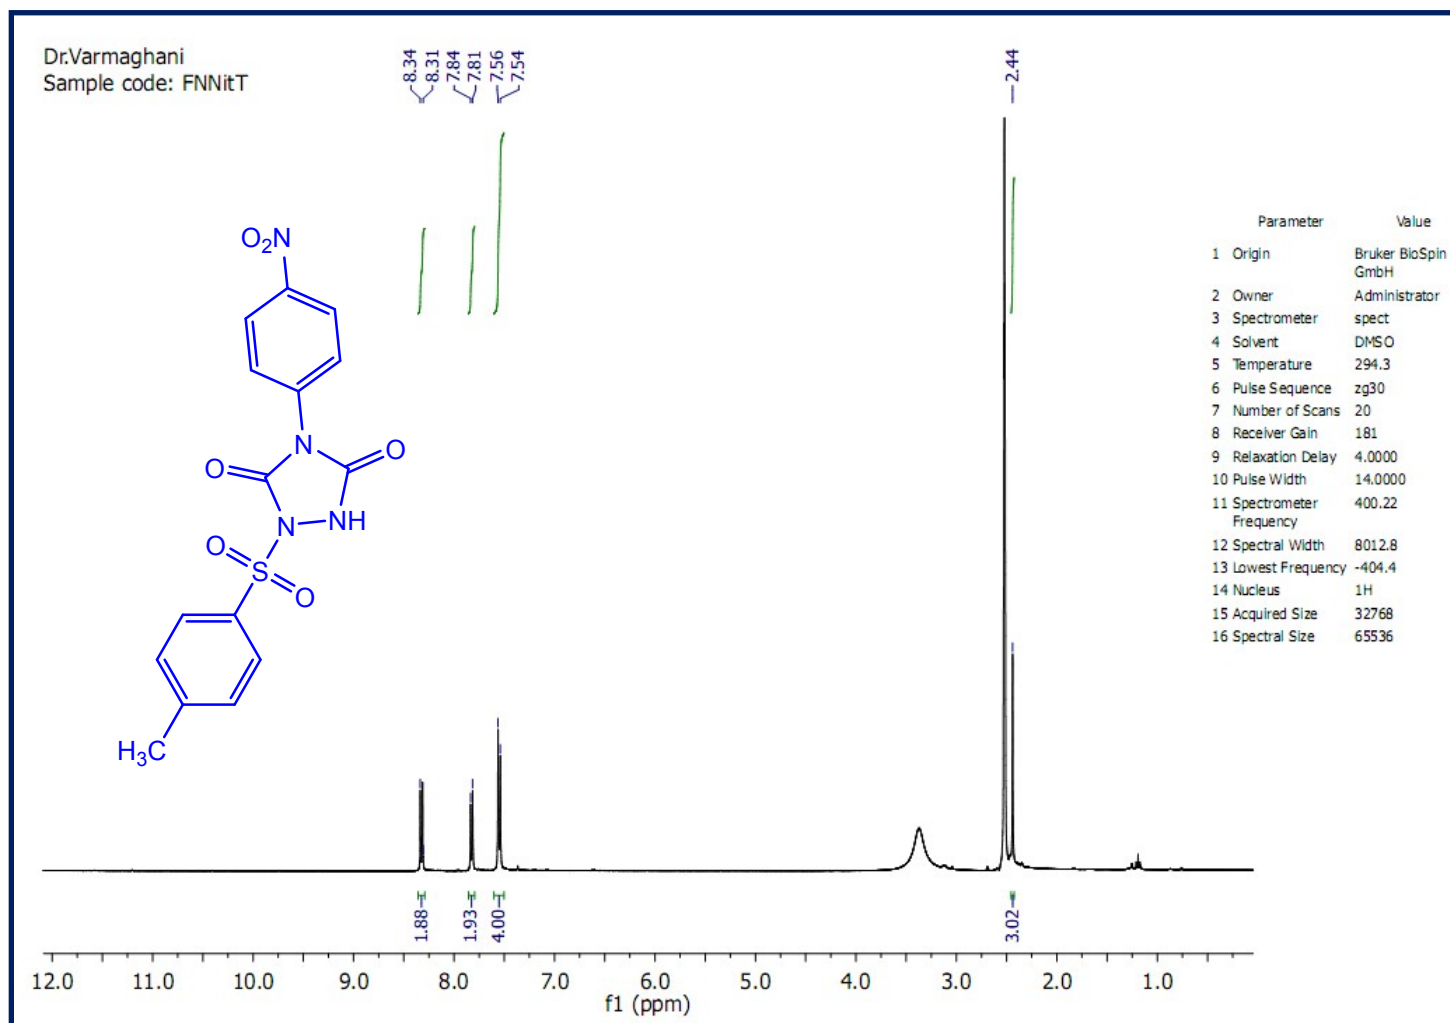

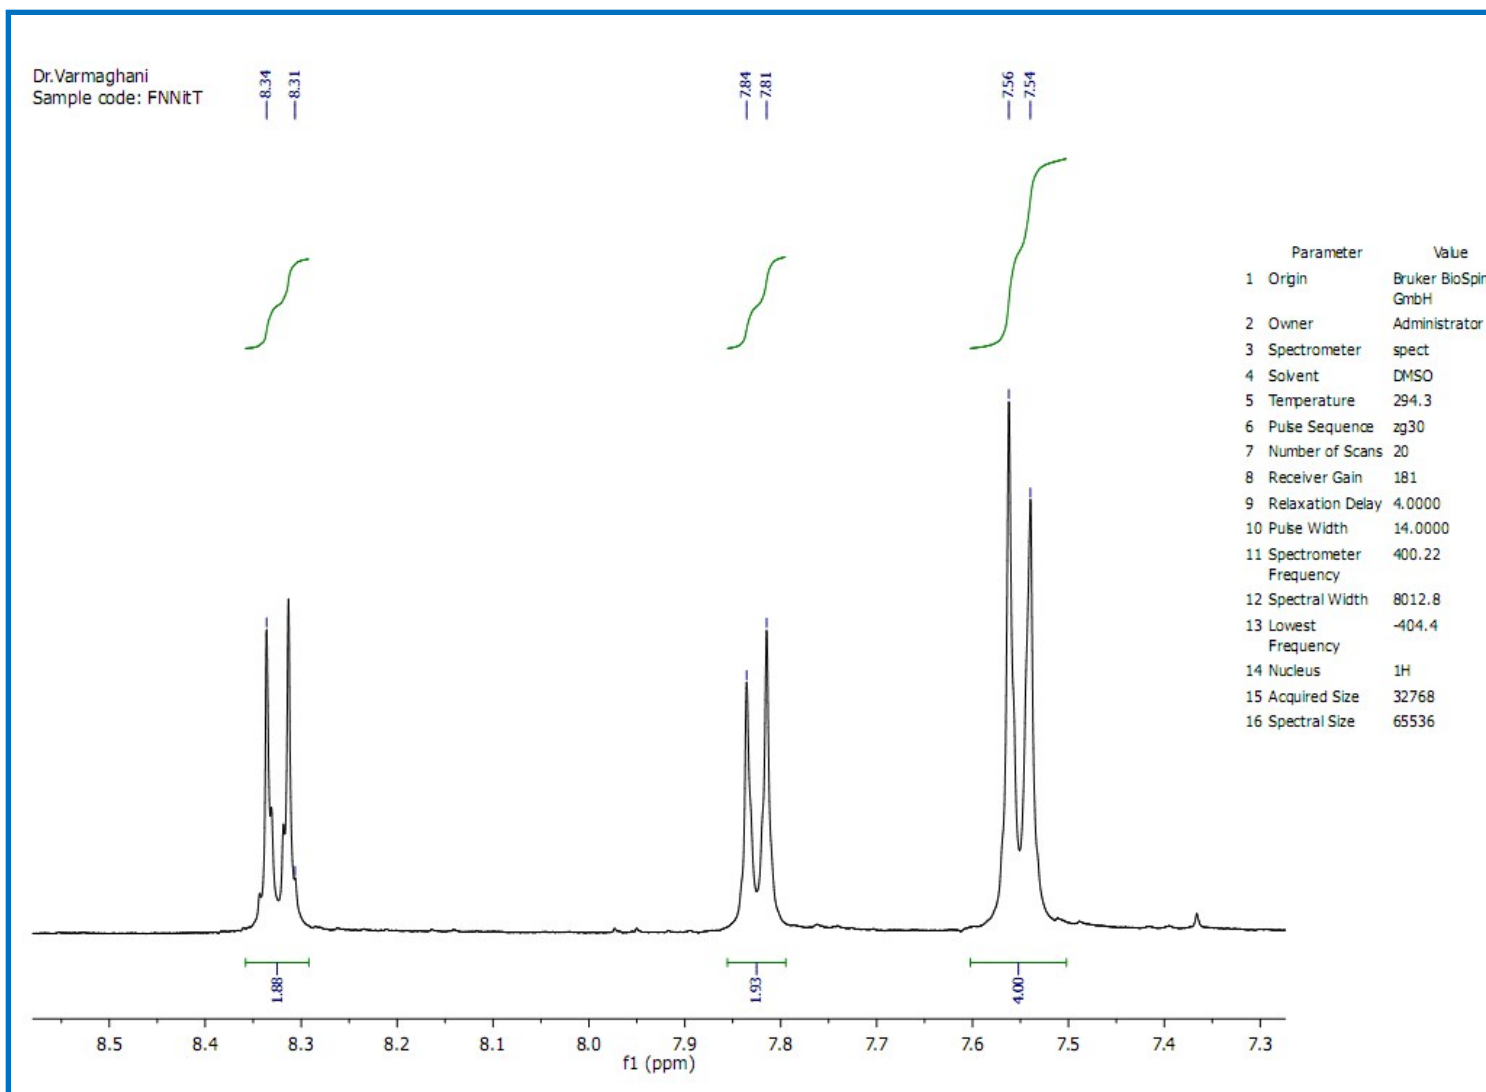

## 6. <sup>13</sup>C NMR spectrum of **2c**

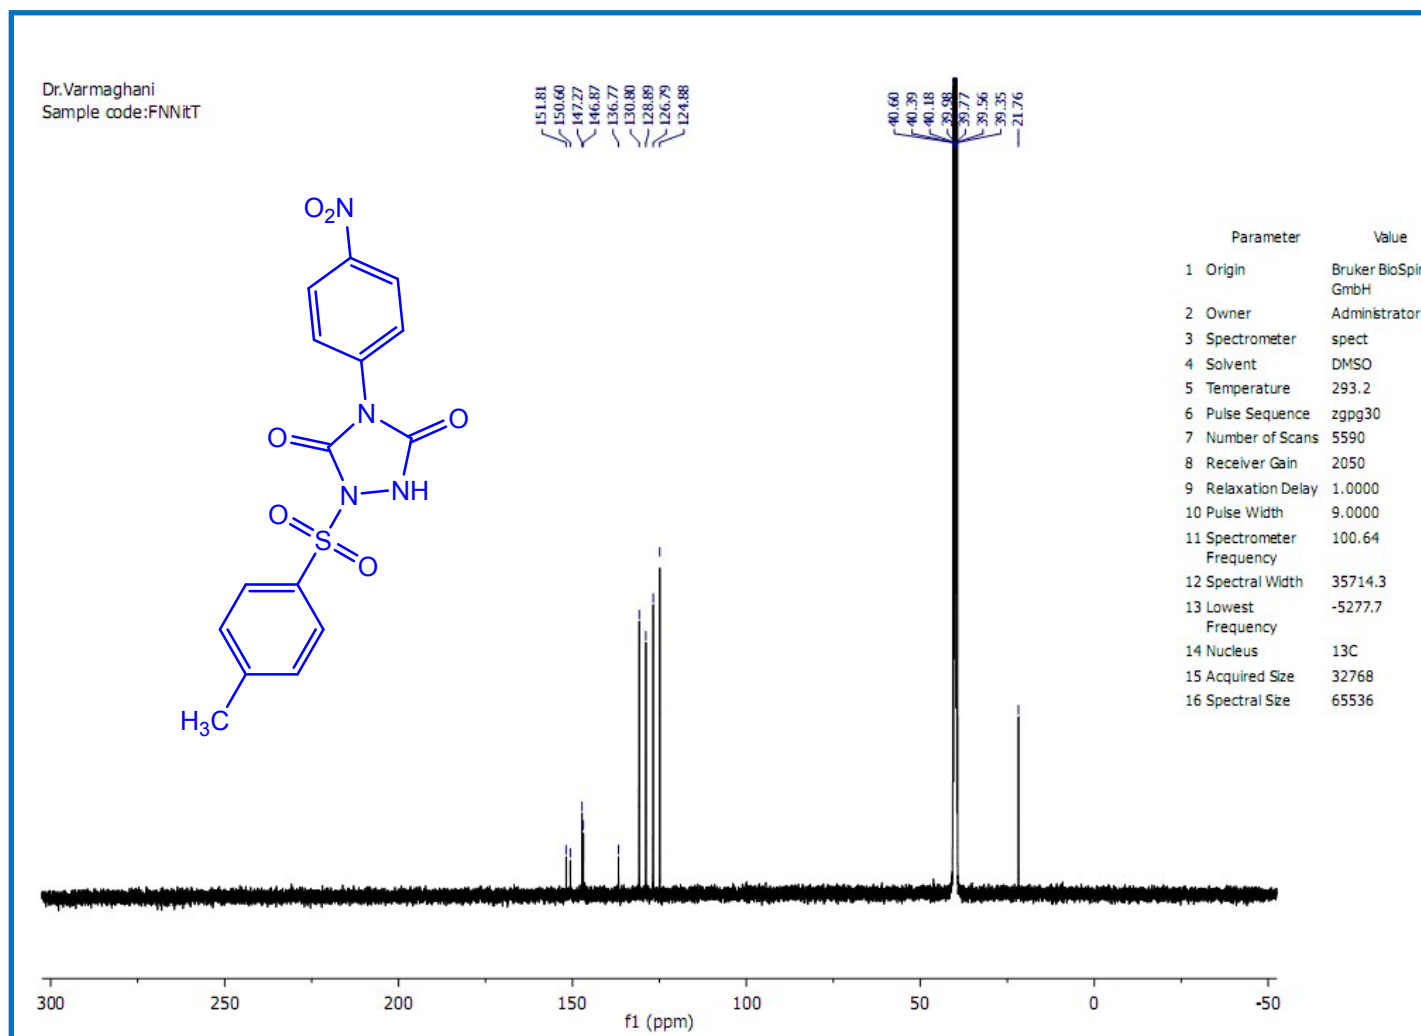

7.  $^1\text{H}$  NMR spectrum of **2d**

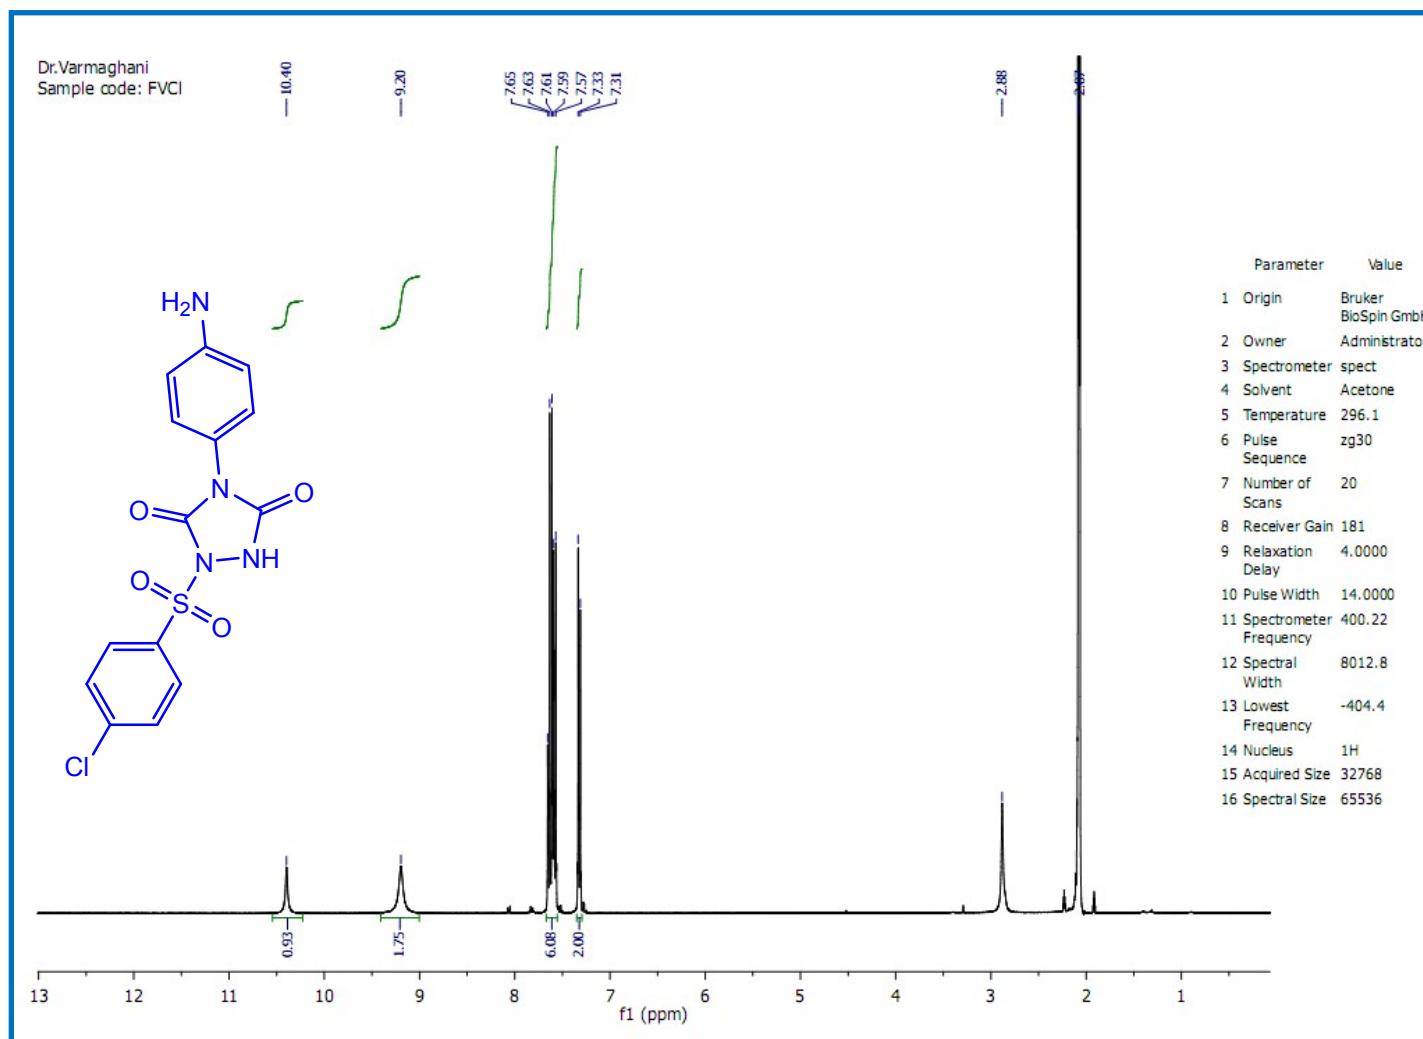

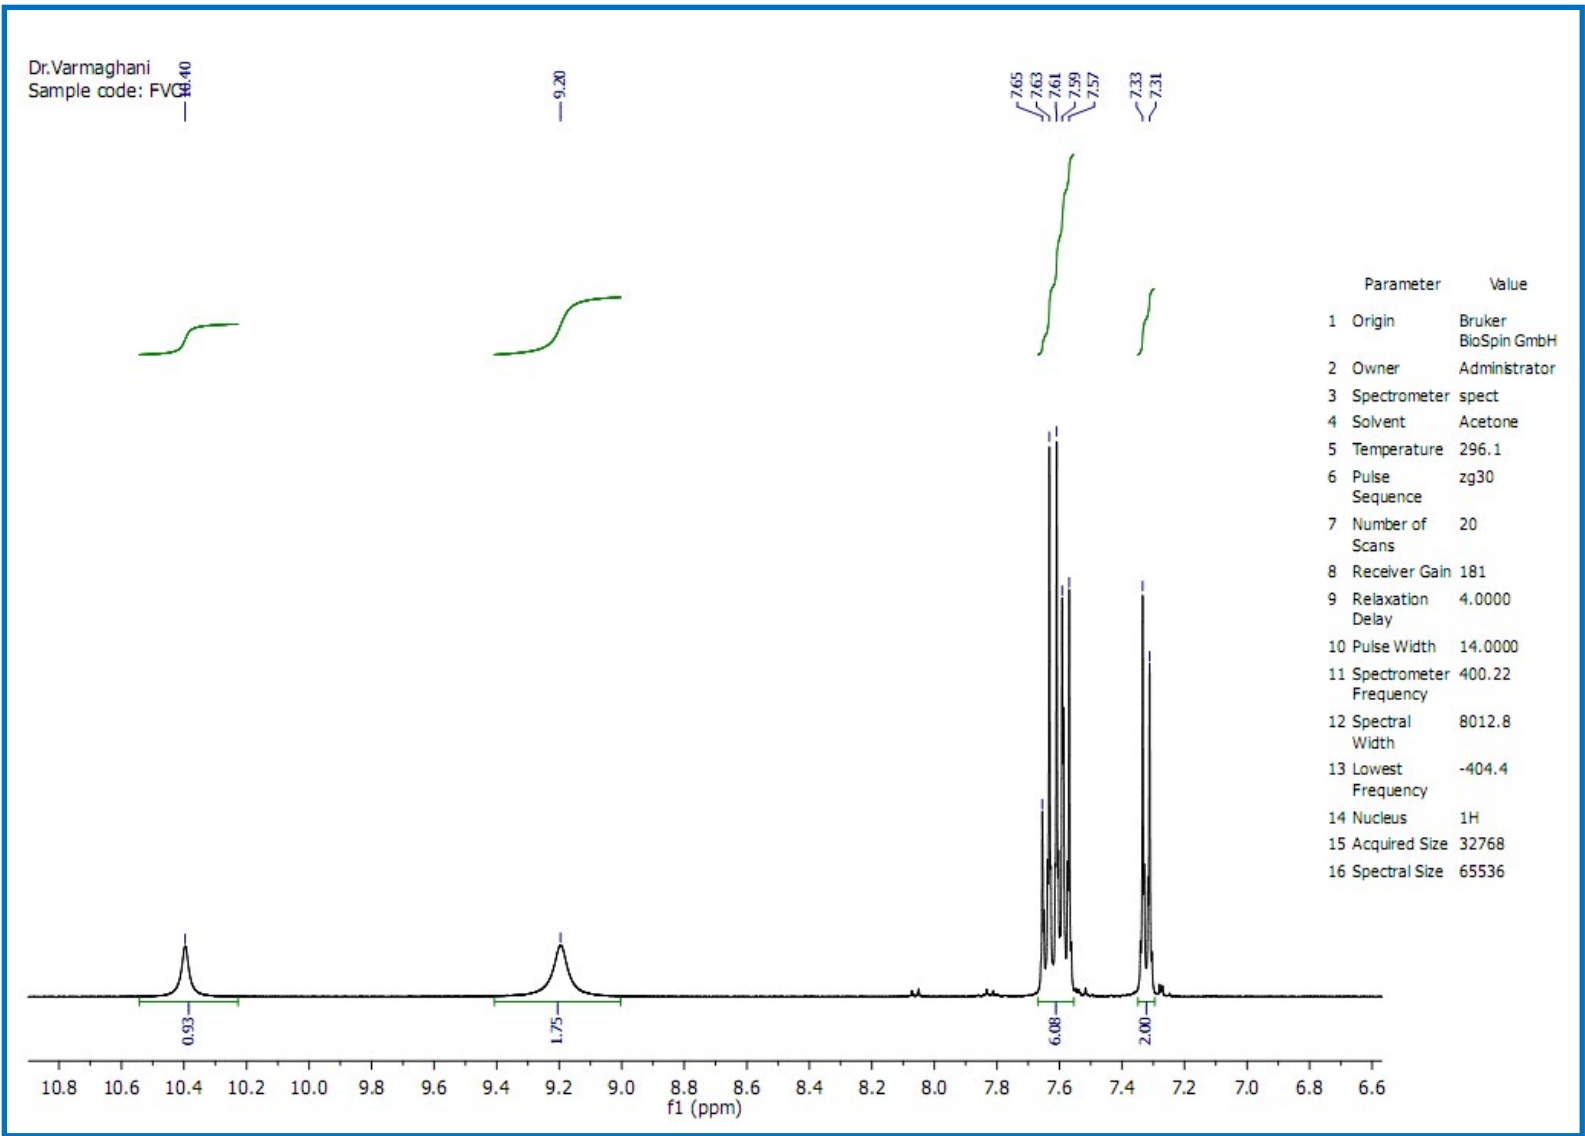

### 8. <sup>13</sup>C NMR spectrum of **2d**

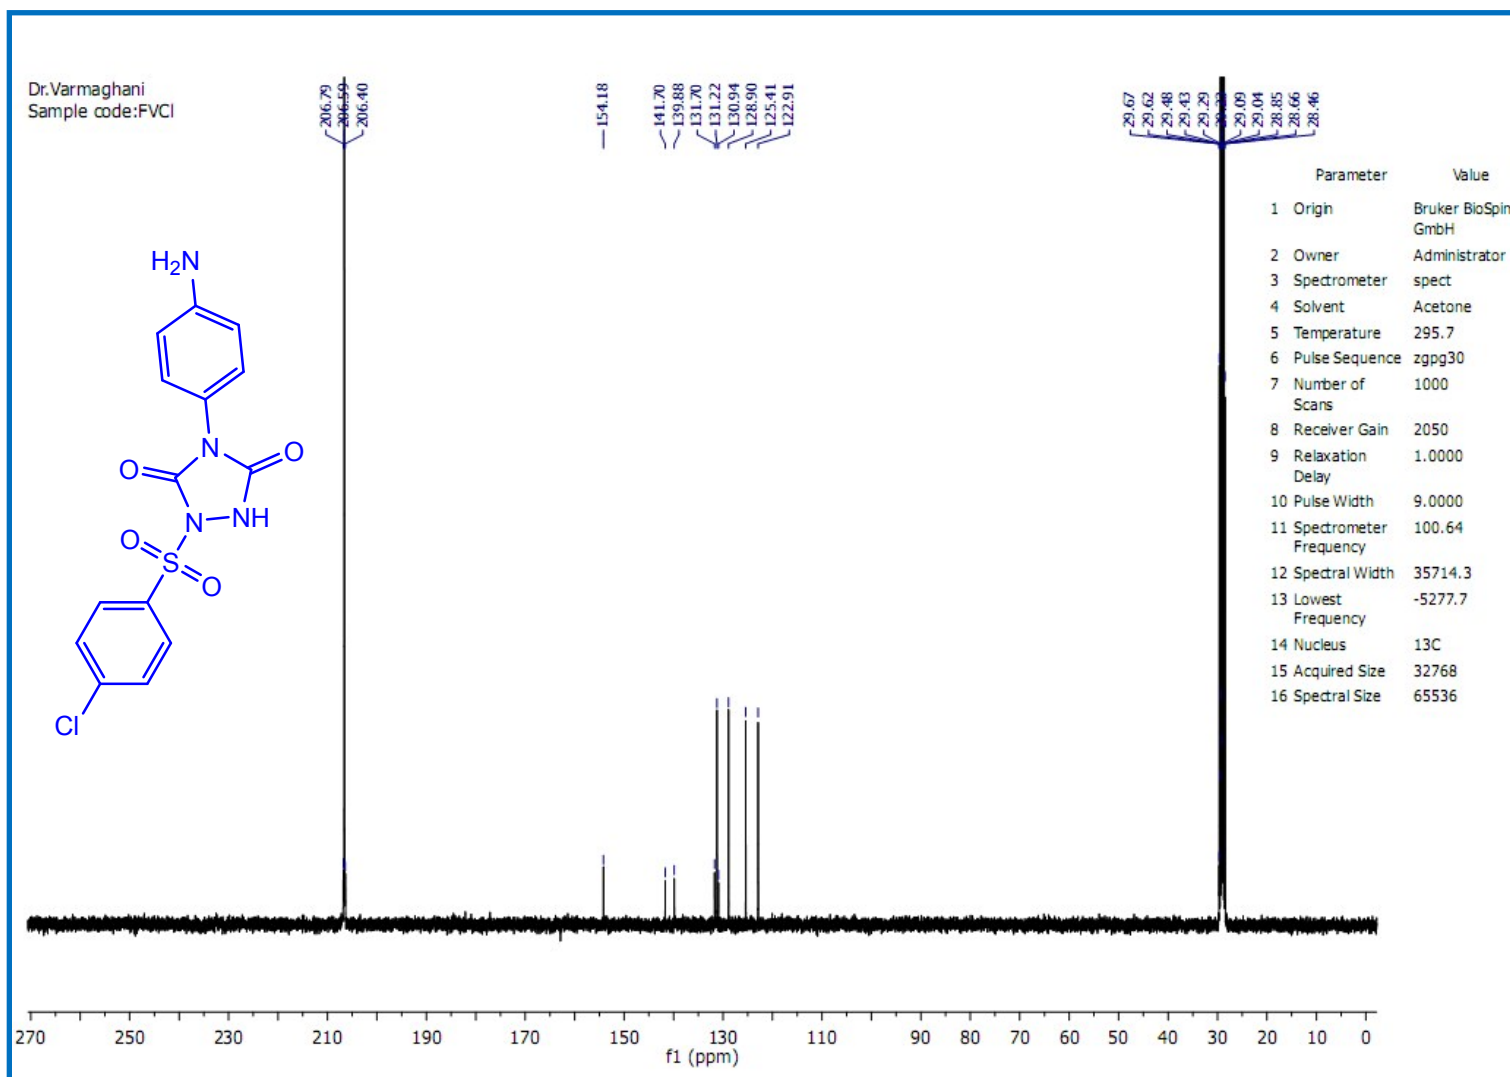





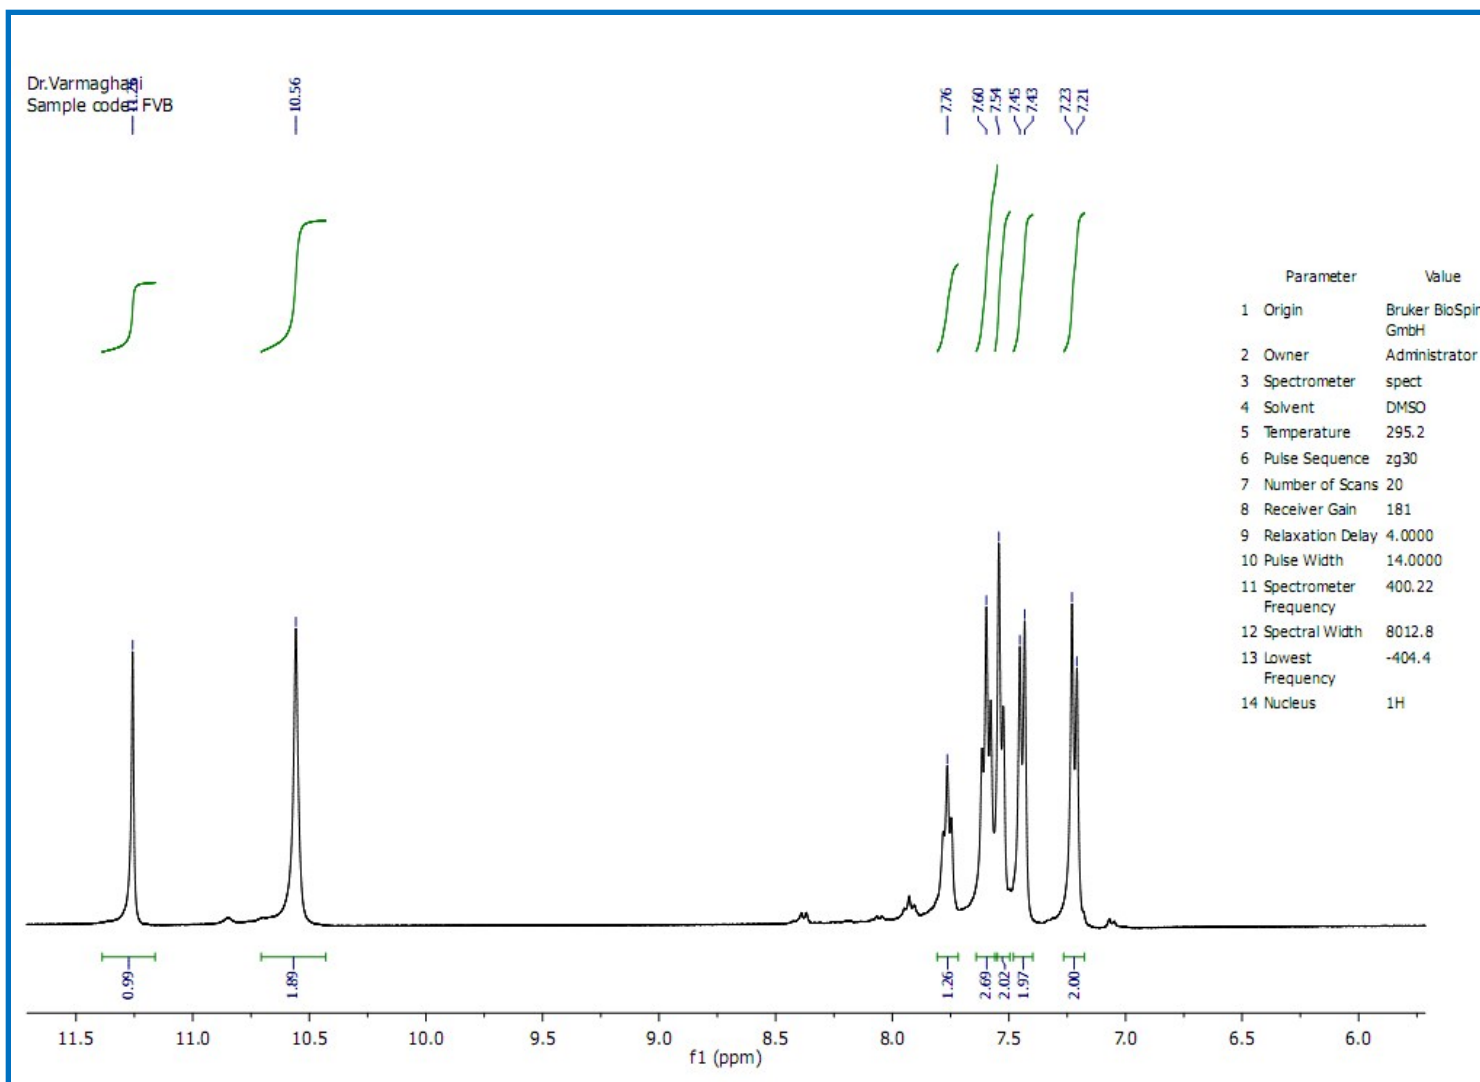

10. <sup>13</sup>C NMR spectrum of **2e**

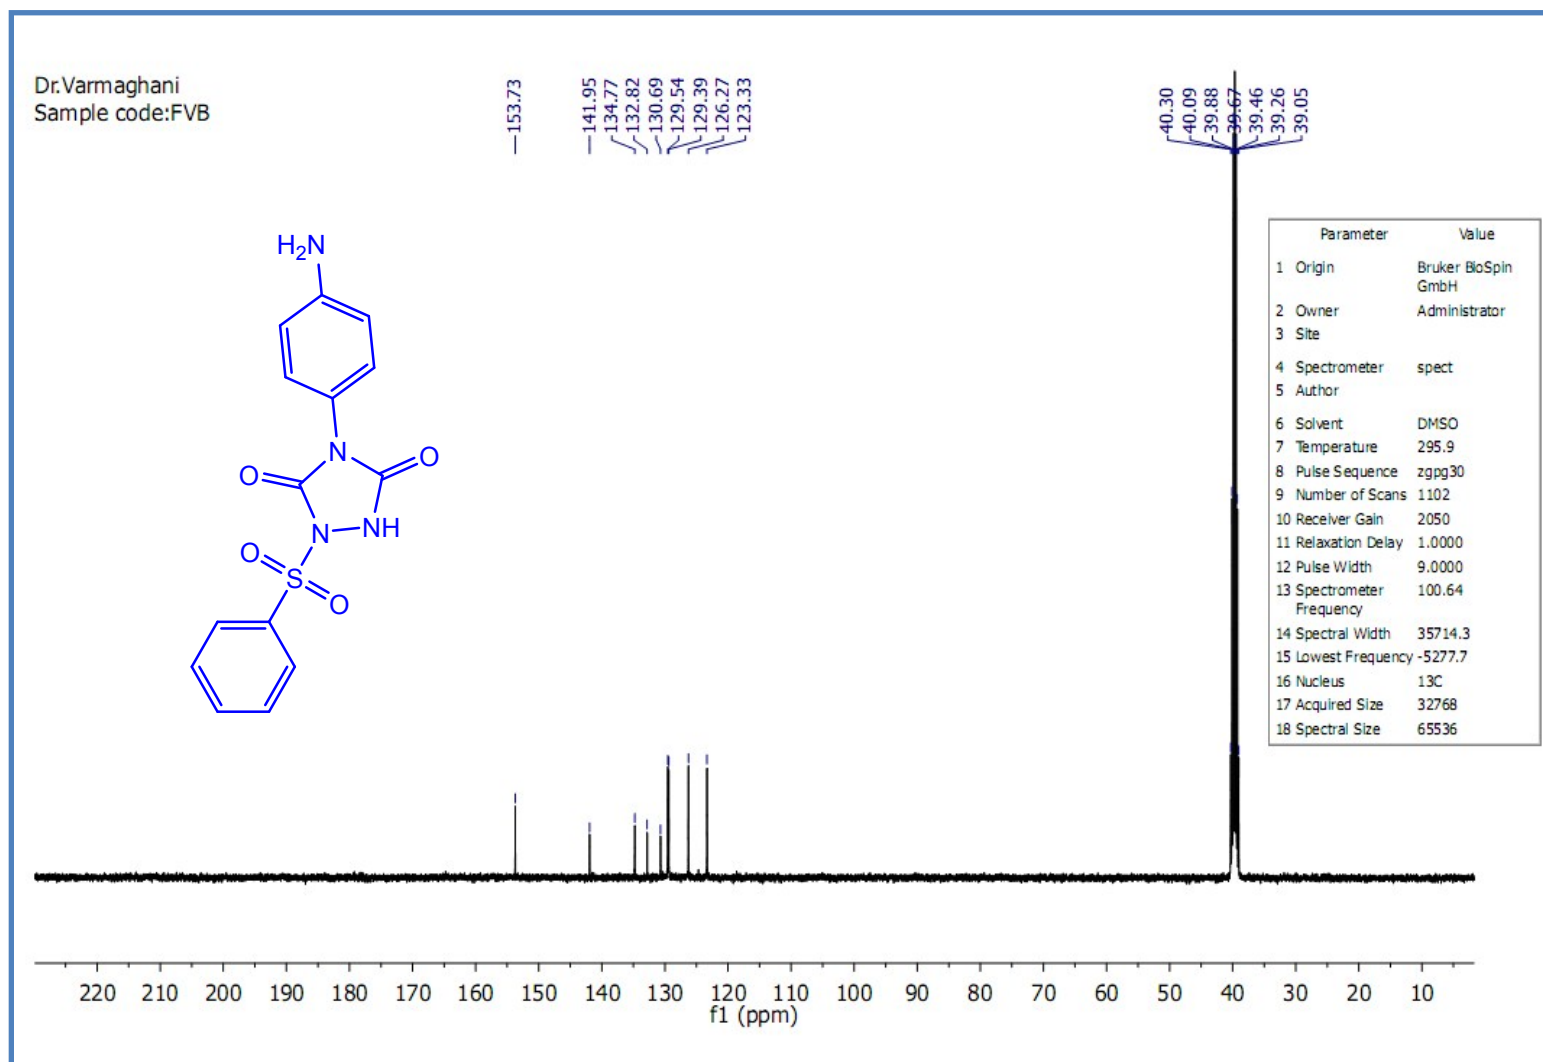

11. <sup>1</sup>H NMR spectrum of **2f**

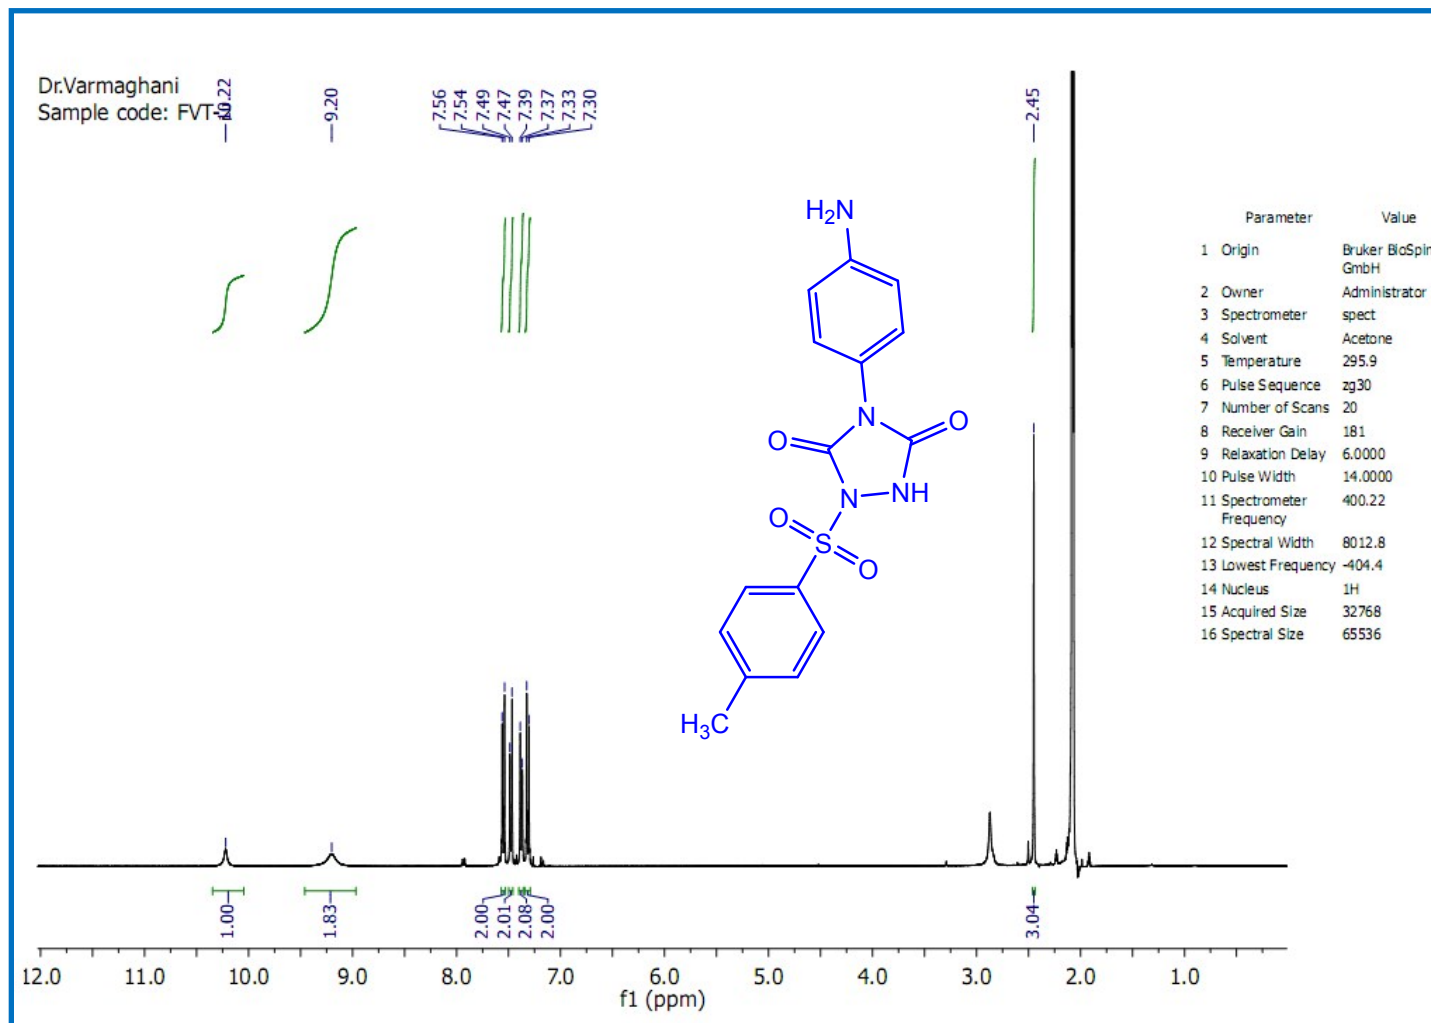

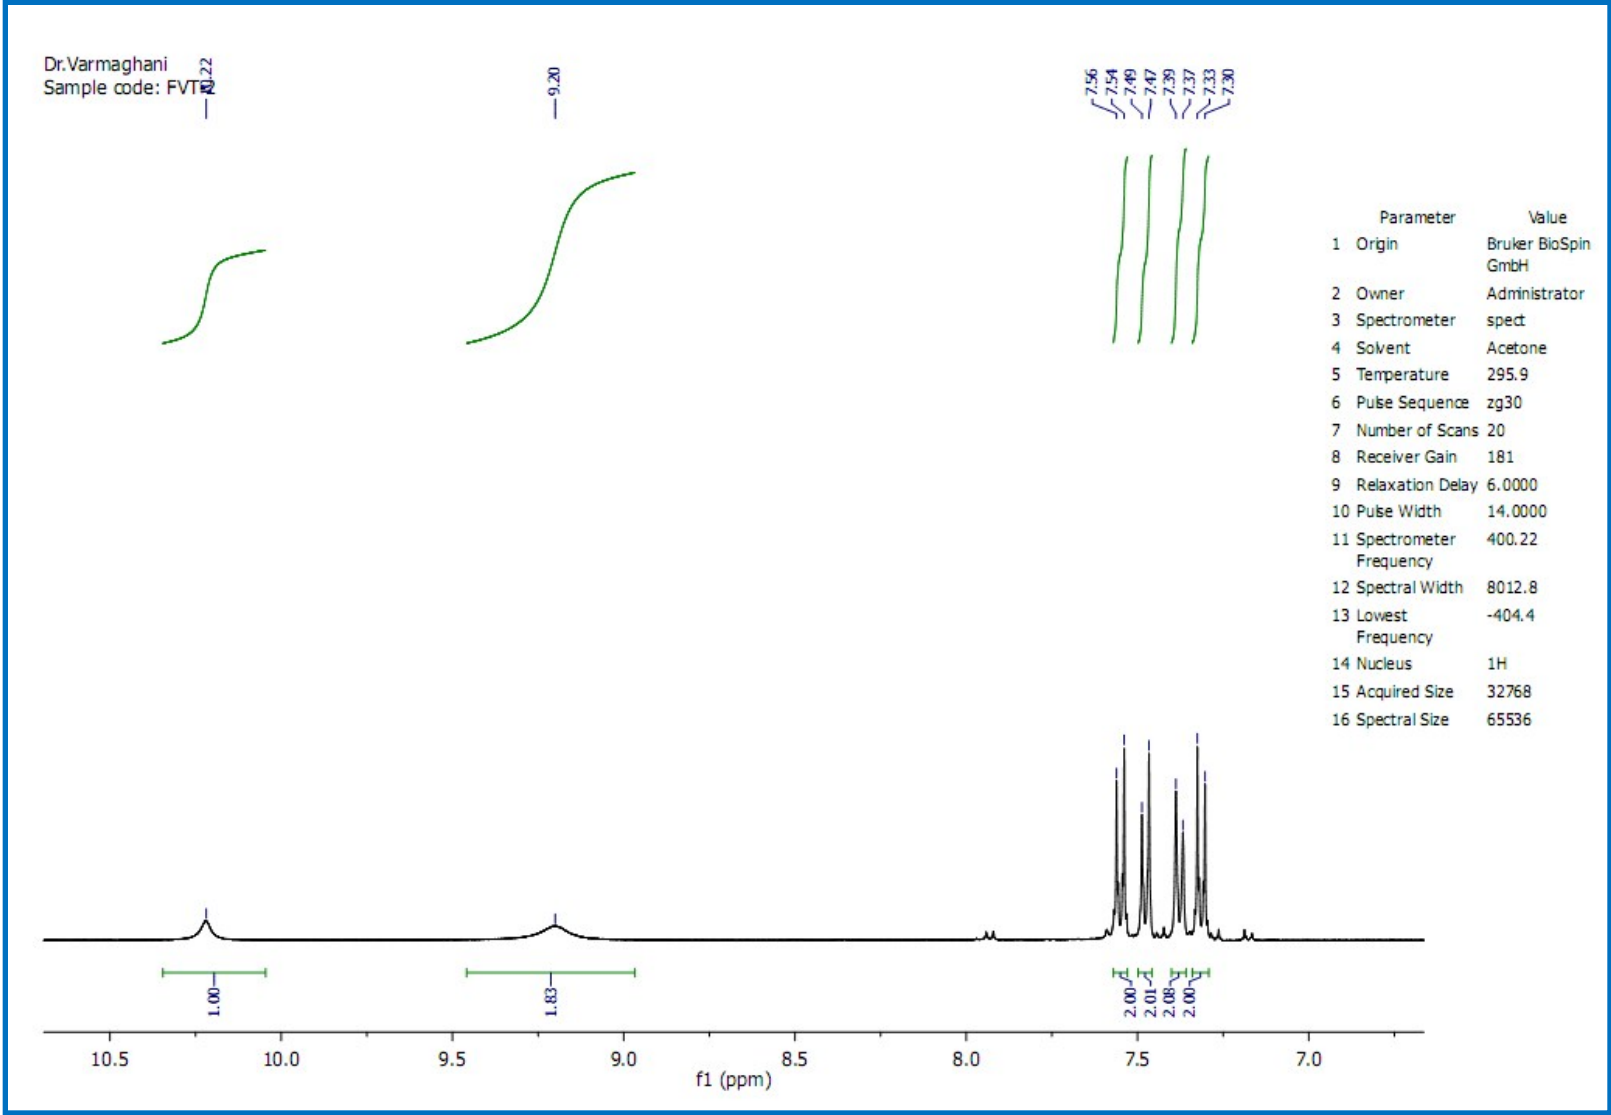

## 12. <sup>13</sup>C NMR spectrum of **2f**

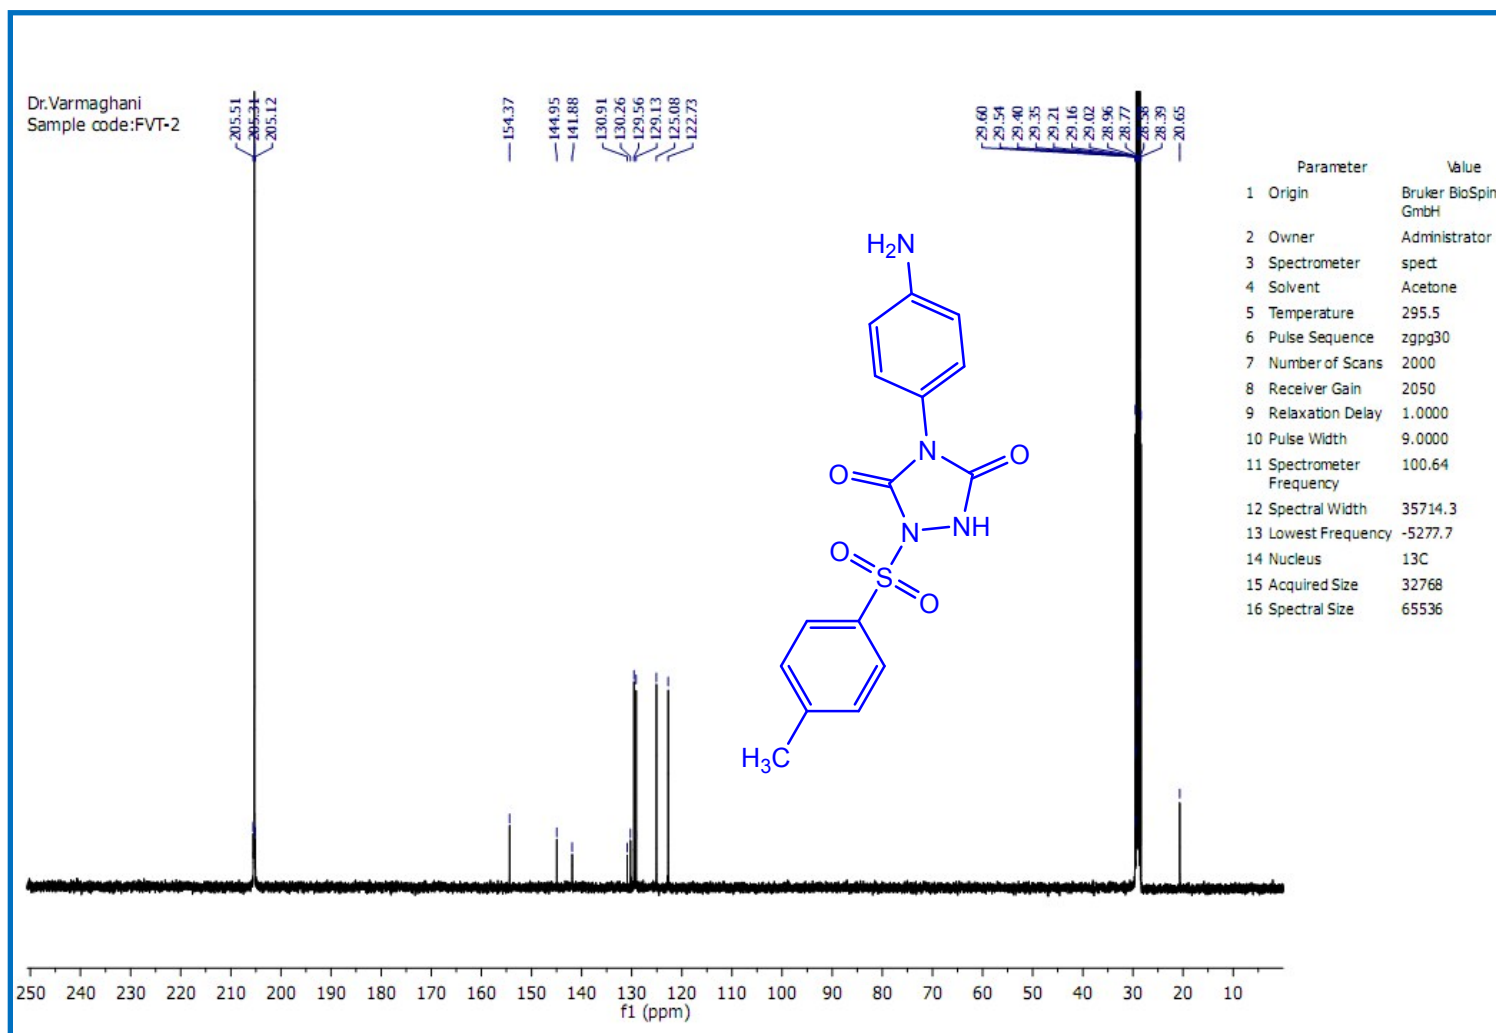

13. <sup>1</sup>H NMR spectrum of **2g**

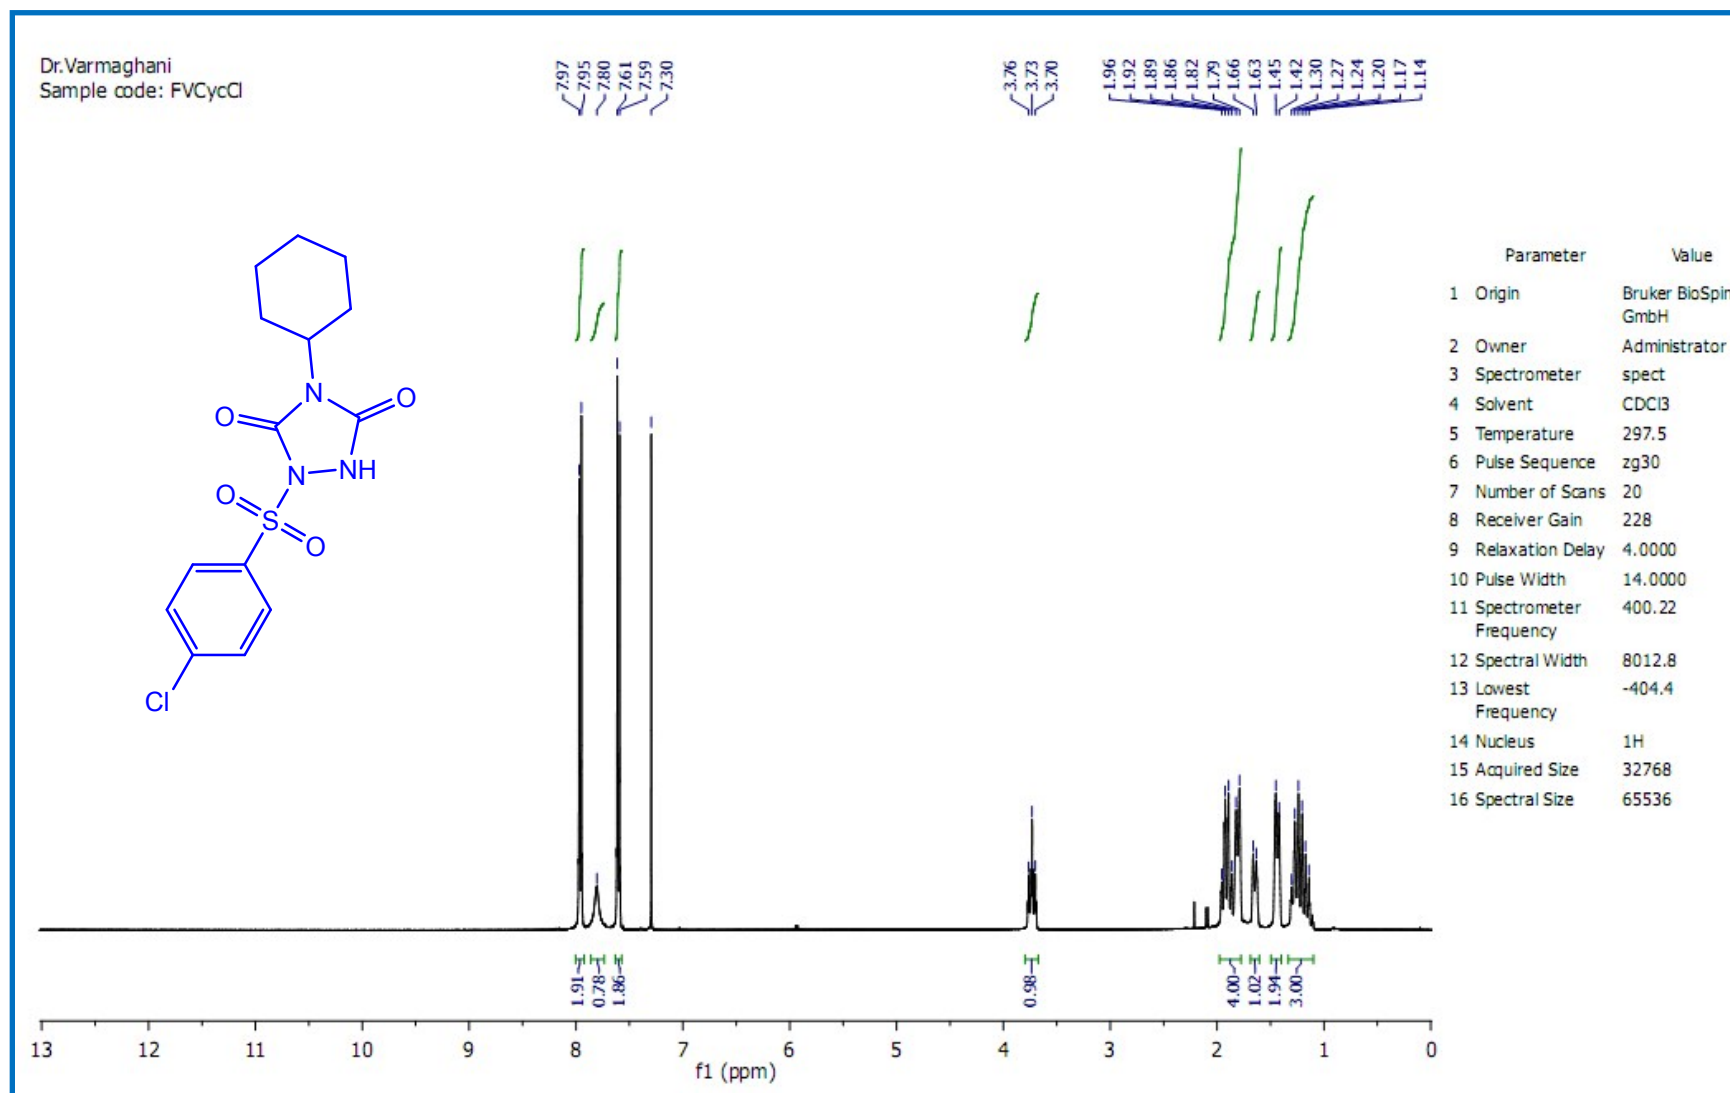

Dr. Varmaghani  
 Sample code: FVCVCC

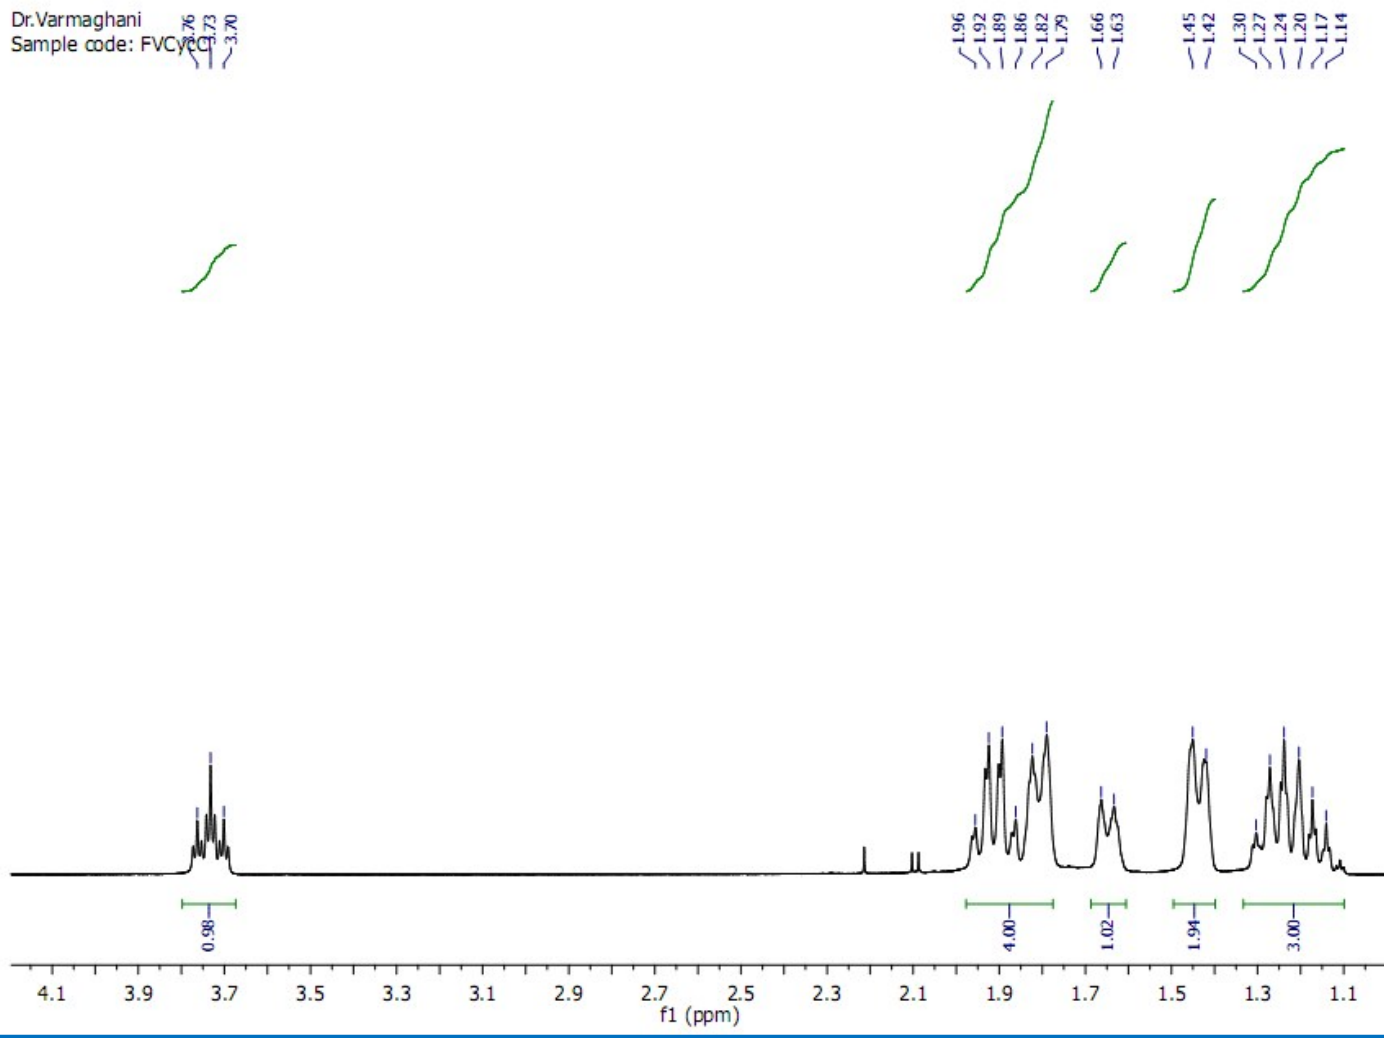

| Parameter                 | Value               |
|---------------------------|---------------------|
| 1 Origin                  | Bruker BioSpin GmbH |
| 2 Owner                   | Administrator       |
| 3 Spectrometer            | spect               |
| 4 Solvent                 | CDCl3               |
| 5 Temperature             | 297.5               |
| 6 Pulse Sequence          | zg30                |
| 7 Number of Scans         | 20                  |
| 8 Receiver Gain           | 228                 |
| 9 Relaxation Delay        | 4.0000              |
| 10 Pulse Width            | 14.0000             |
| 11 Spectrometer Frequency | 400.22              |
| 12 Spectral Width         | 8012.8              |
| 13 Lowest Frequency       | -404.4              |
| 14 Nucleus                | 1H                  |
| 15 Acquired Size          | 32768               |
| 16 Spectral Size          | 65536               |

Dr.Varmaghani  
Sample code: FVCycCl

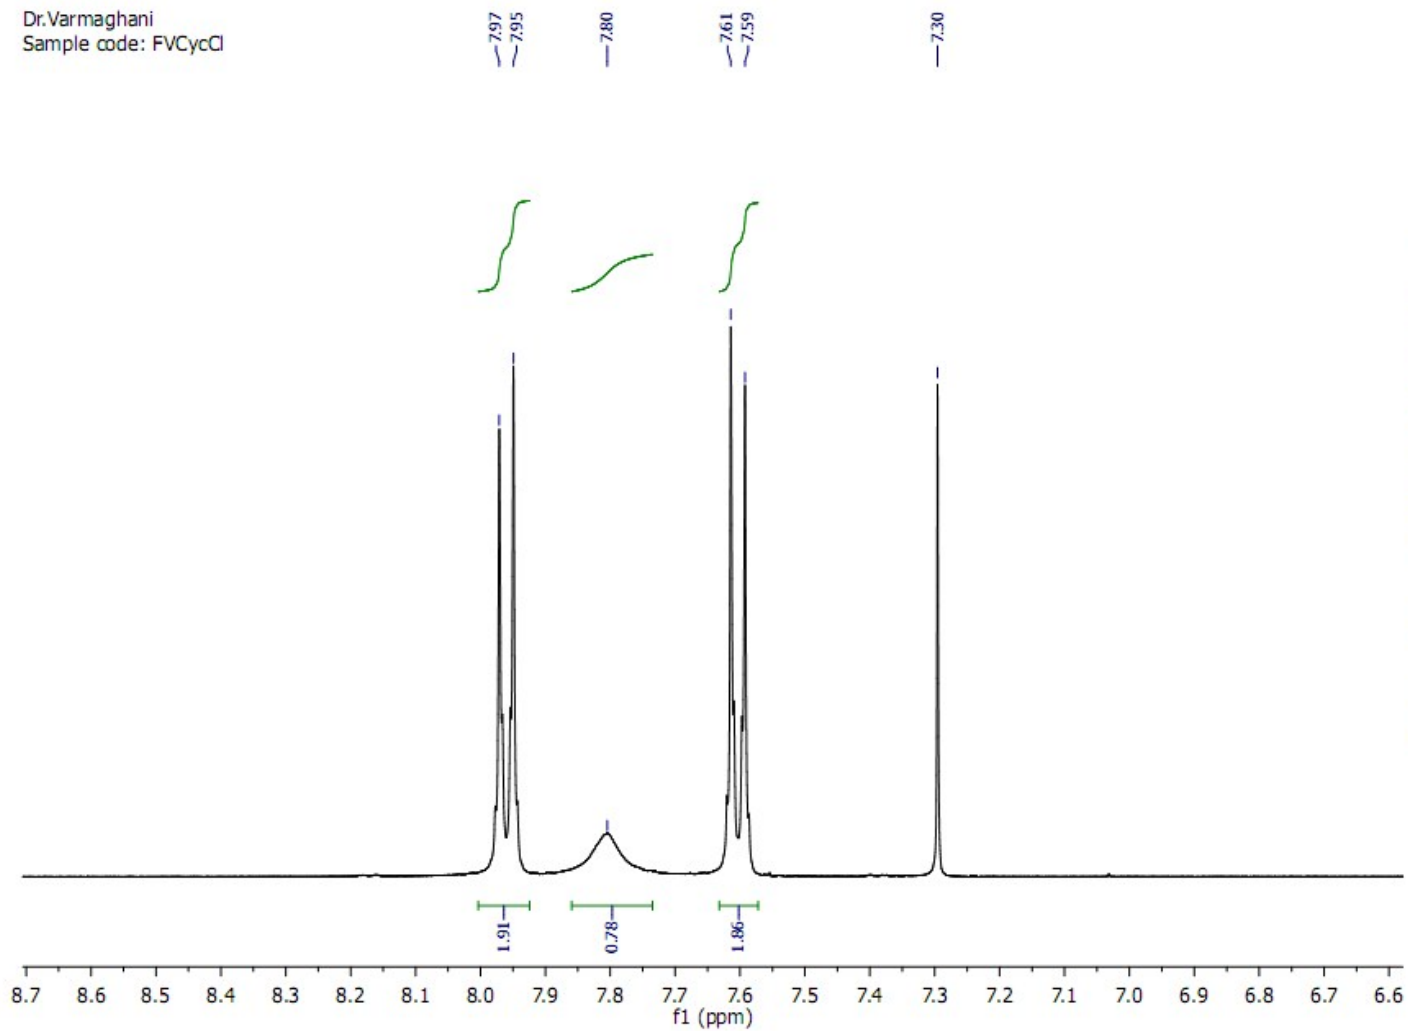



14. <sup>13</sup>C NMR spectrum of **2g**

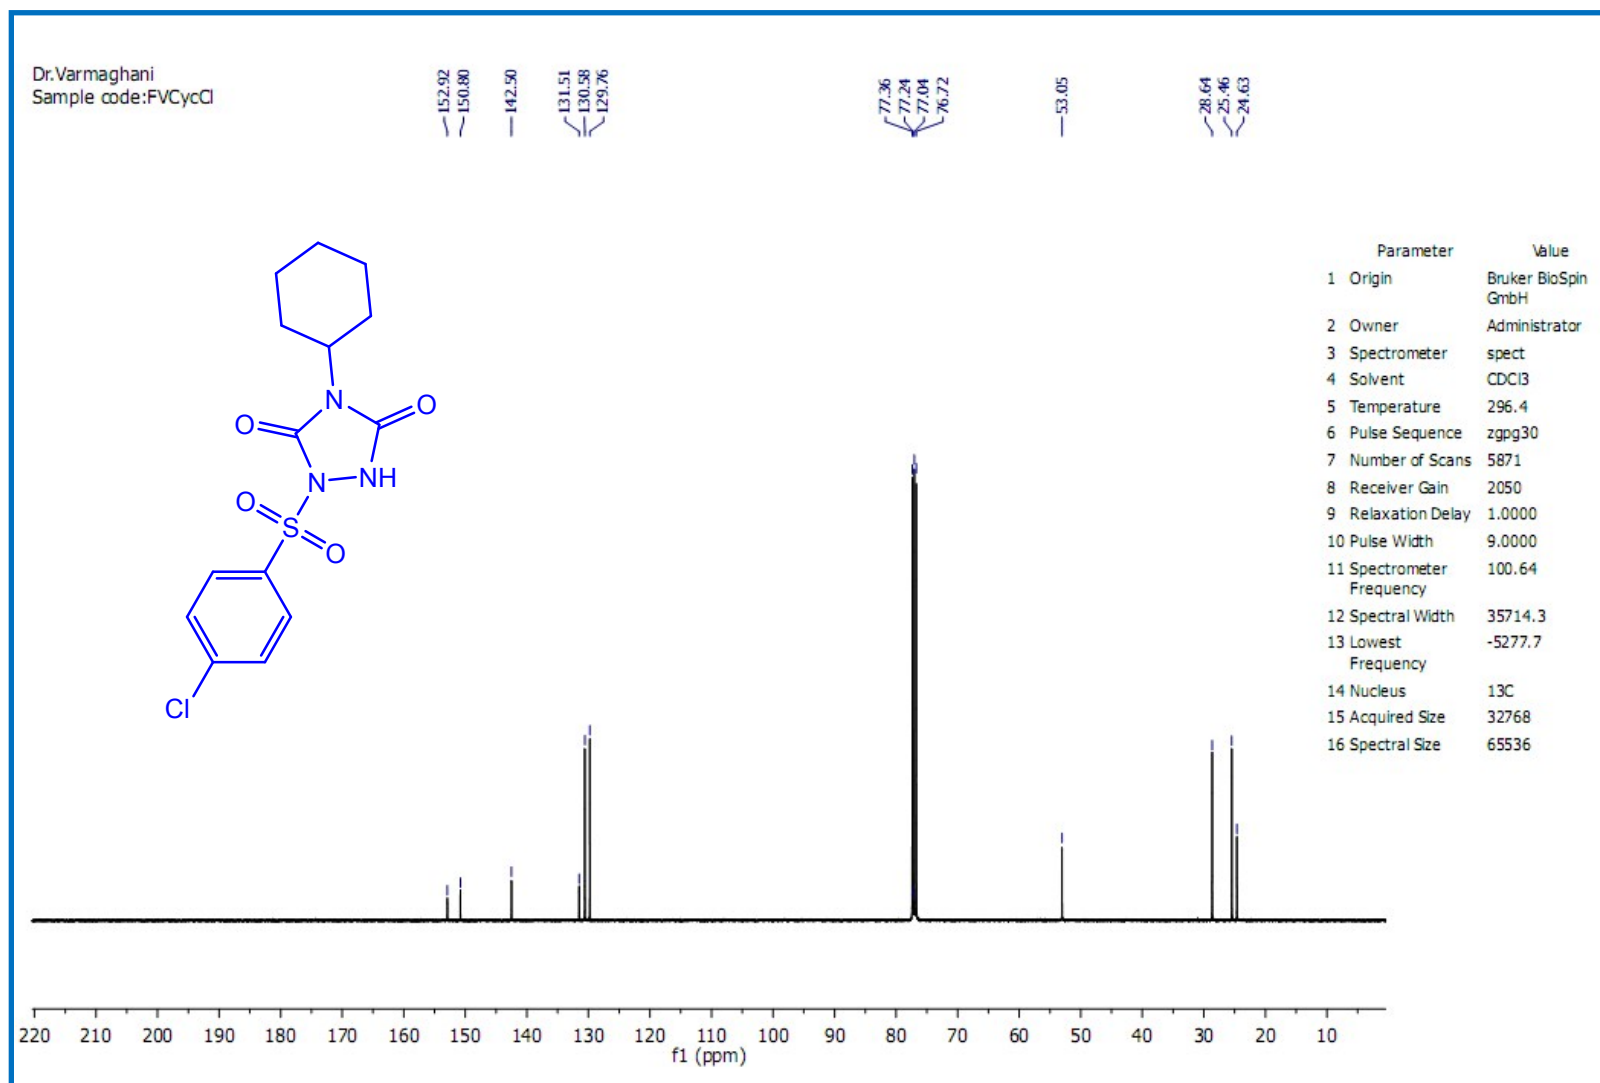

15.  $^1\text{H}$  NMR spectrum of **2h**

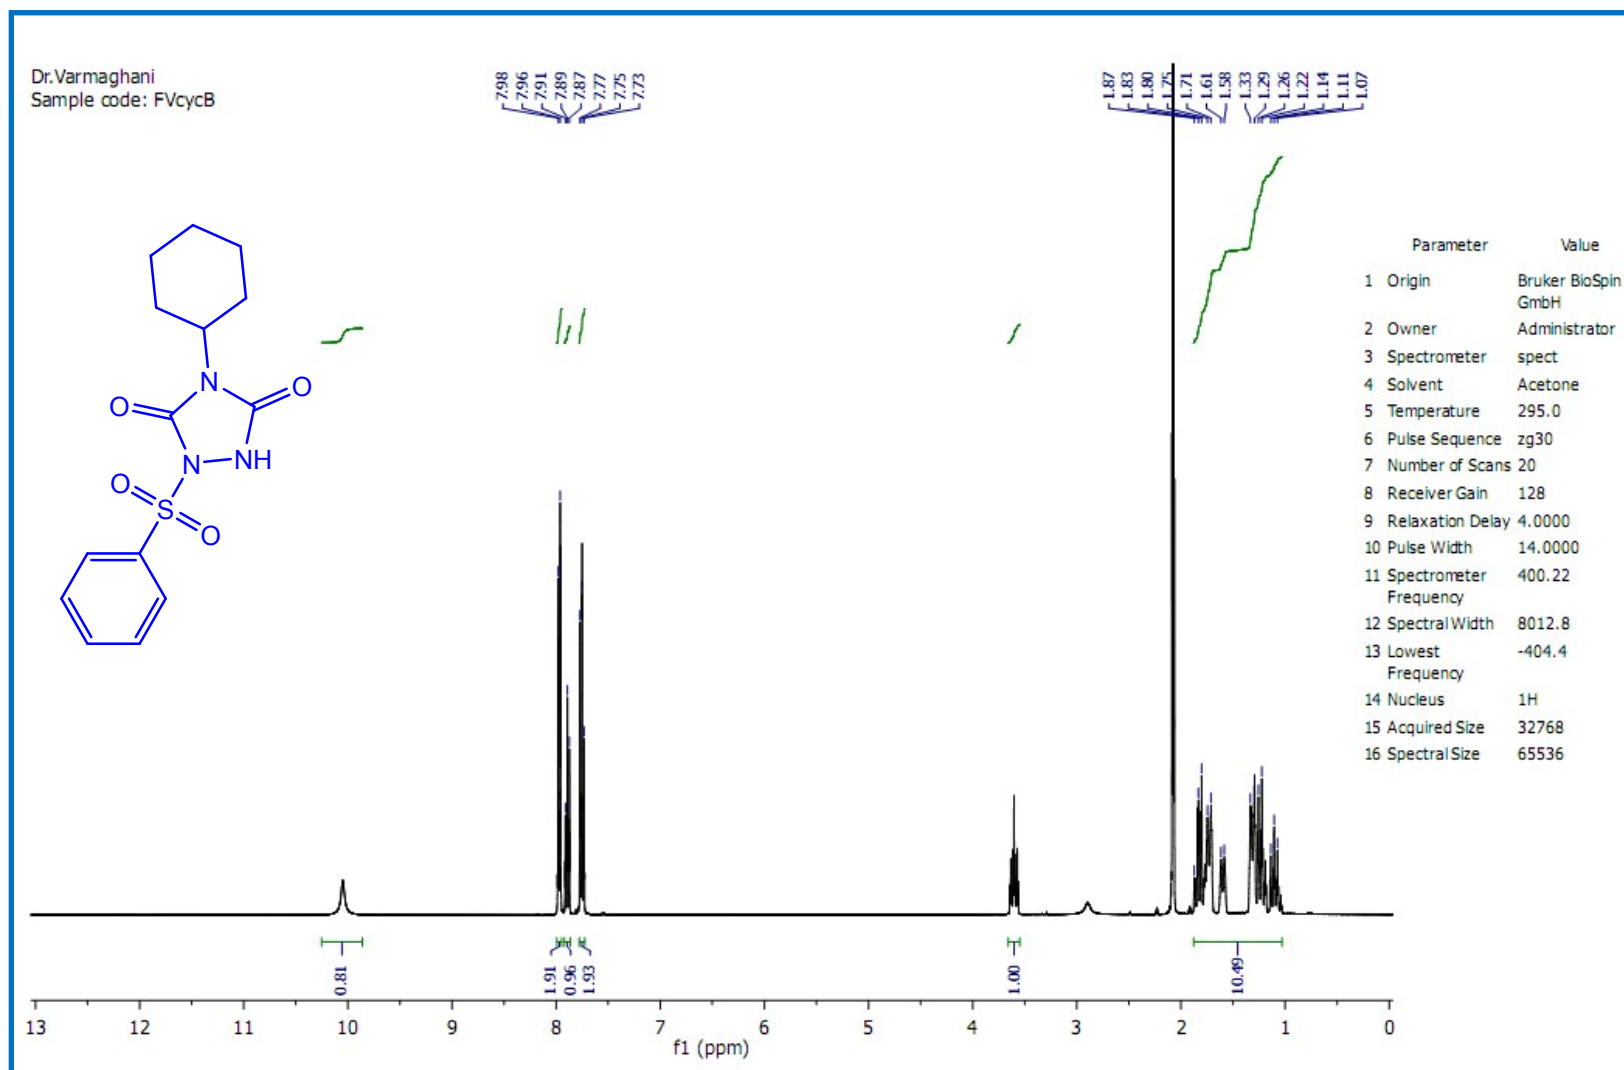

Dr.Varmaghani  
Sample code: FVcycB

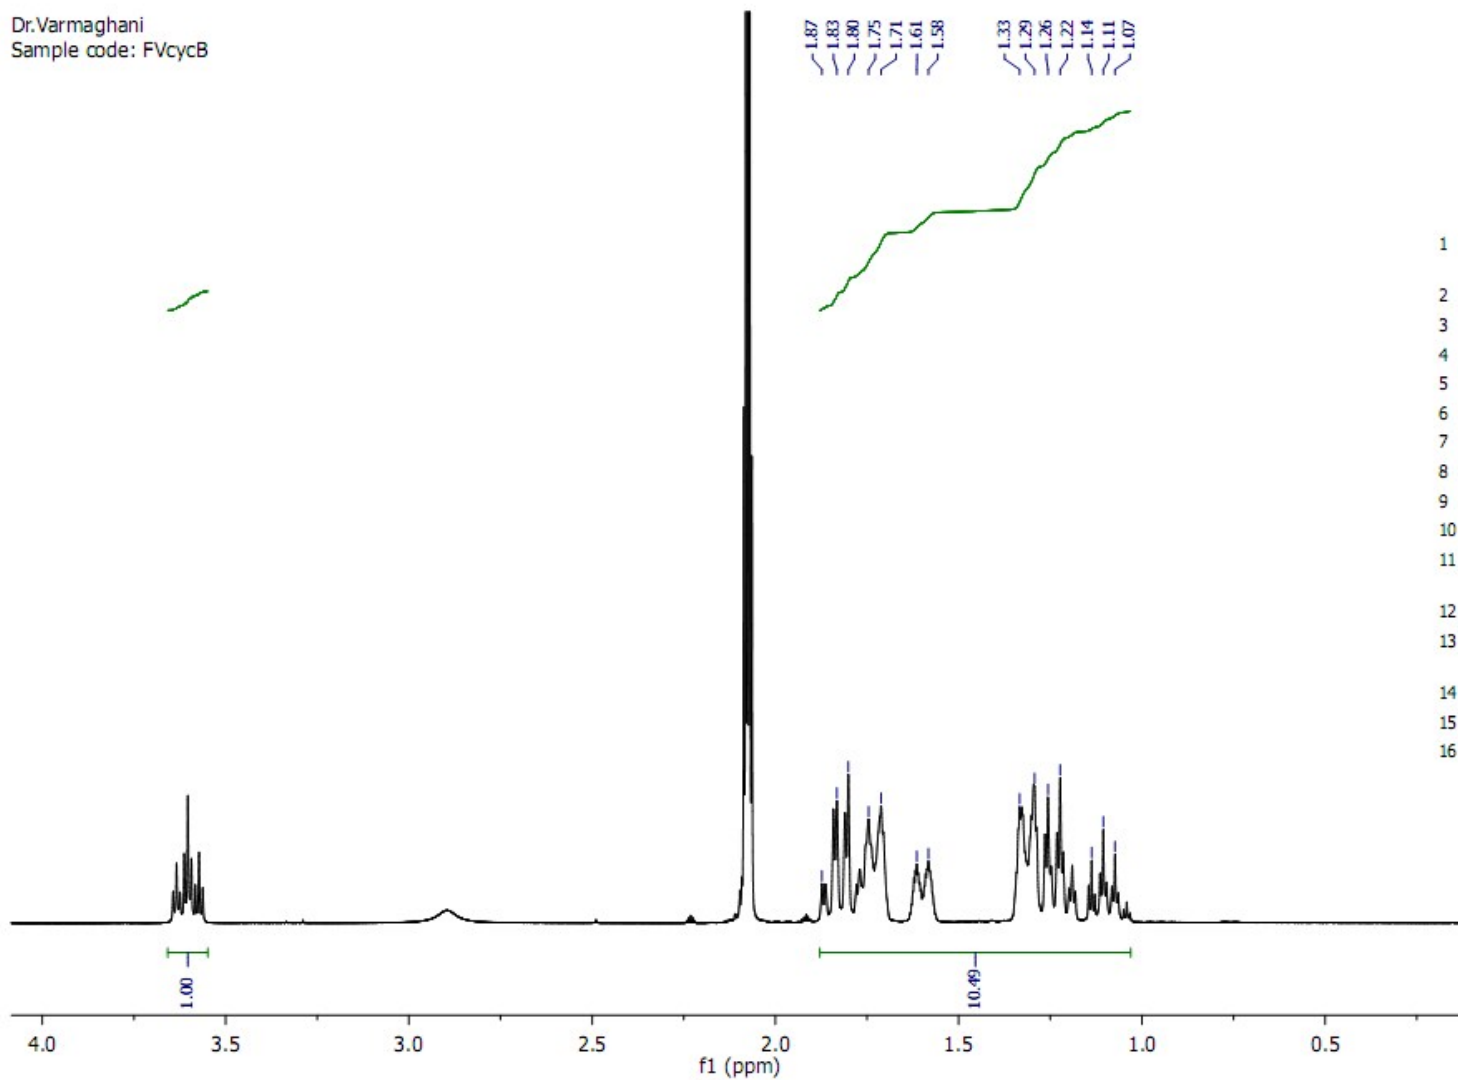

| Parameter                 | Value               |
|---------------------------|---------------------|
| 1 Origin                  | Bruker BioSpin GmbH |
| 2 Owner                   | Administrator       |
| 3 Spectrometer            | spect               |
| 4 Solvent                 | Acetone             |
| 5 Temperature             | 295.0               |
| 6 Pulse Sequence          | zg30                |
| 7 Number of Scans         | 20                  |
| 8 Receiver Gain           | 128                 |
| 9 Relaxation Delay        | 4.0000              |
| 10 Pulse Width            | 14.0000             |
| 11 Spectrometer Frequency | 400.22              |
| 12 Spectral Width         | 8012.8              |
| 13 Lowest Frequency       | -404.4              |
| 14 Nucleus                | <sup>1</sup> H      |
| 15 Acquired Size          | 32768               |
| 16 Spectral Size          | 65536               |

Dr.Varmaghani  
Sample code: FVcycB

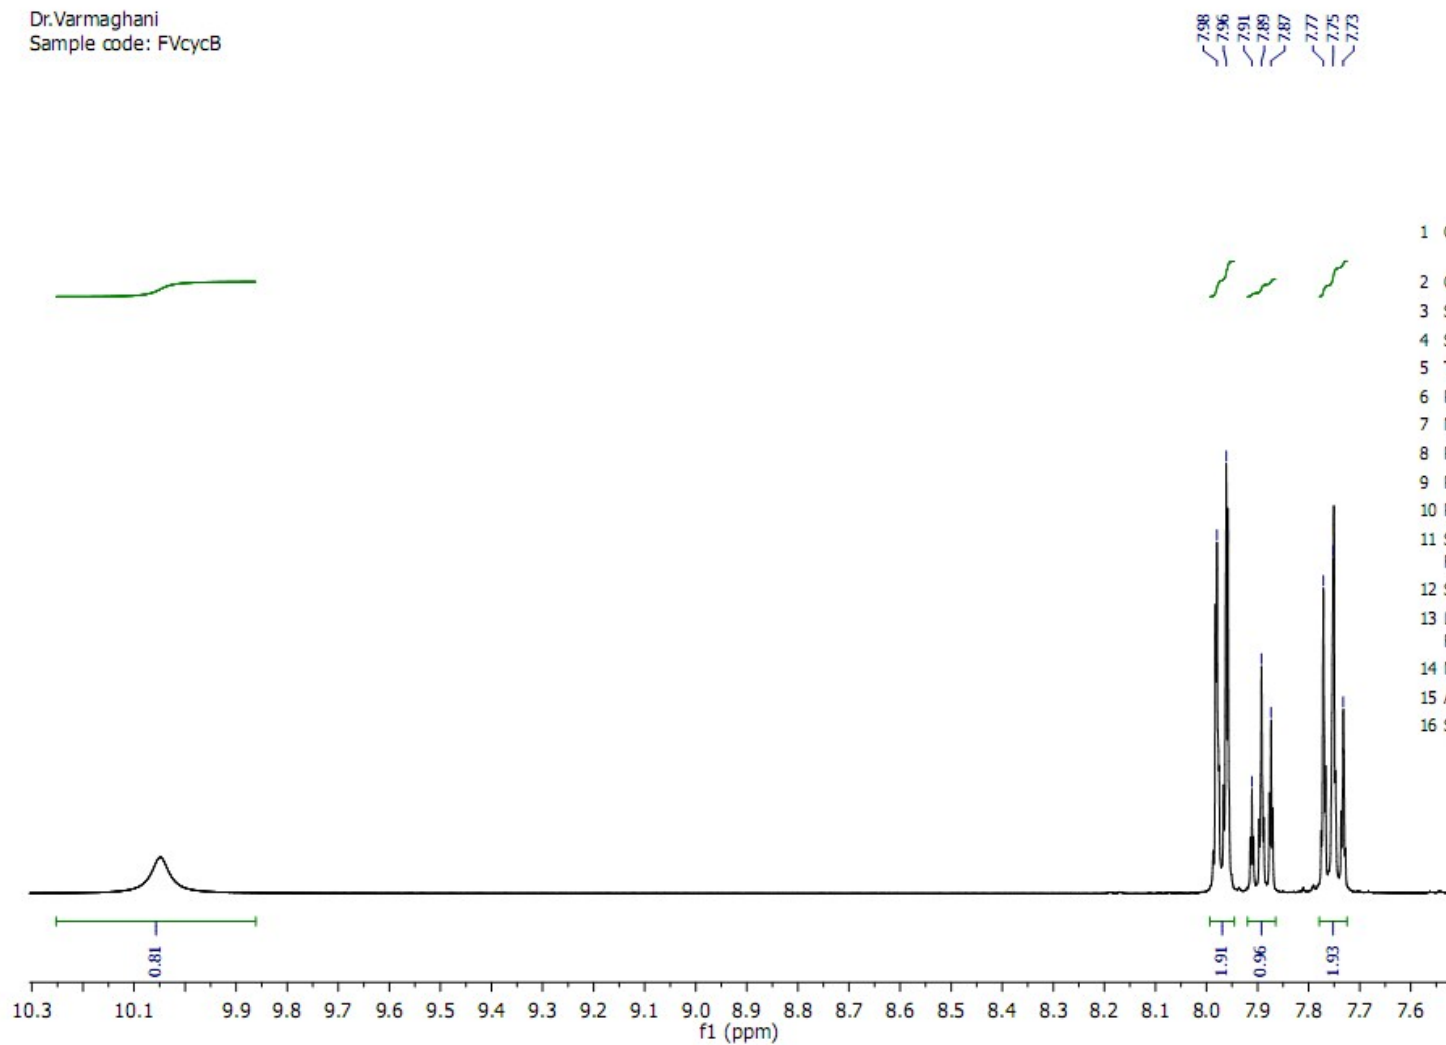

| Parameter                 | Value               |
|---------------------------|---------------------|
| 1 Origin                  | Bruker BioSpin GmbH |
| 2 Owner                   | Administrator       |
| 3 Spectrometer            | spect               |
| 4 Solvent                 | Acetone             |
| 5 Temperature             | 295.0               |
| 6 Pulse Sequence          | zg30                |
| 7 Number of Scans         | 20                  |
| 8 Receiver Gain           | 128                 |
| 9 Relaxation Delay        | 4.0000              |
| 10 Pulse Width            | 14.0000             |
| 11 Spectrometer Frequency | 400.22              |
| 12 Spectral Width         | 8012.8              |
| 13 Lowest Frequency       | -404.4              |
| 14 Nucleus                | <sup>1</sup> H      |
| 15 Acquired Size          | 32768               |
| 16 Spectral Size          | 65536               |

### 16. <sup>13</sup>C NMR spectrum of **2h**

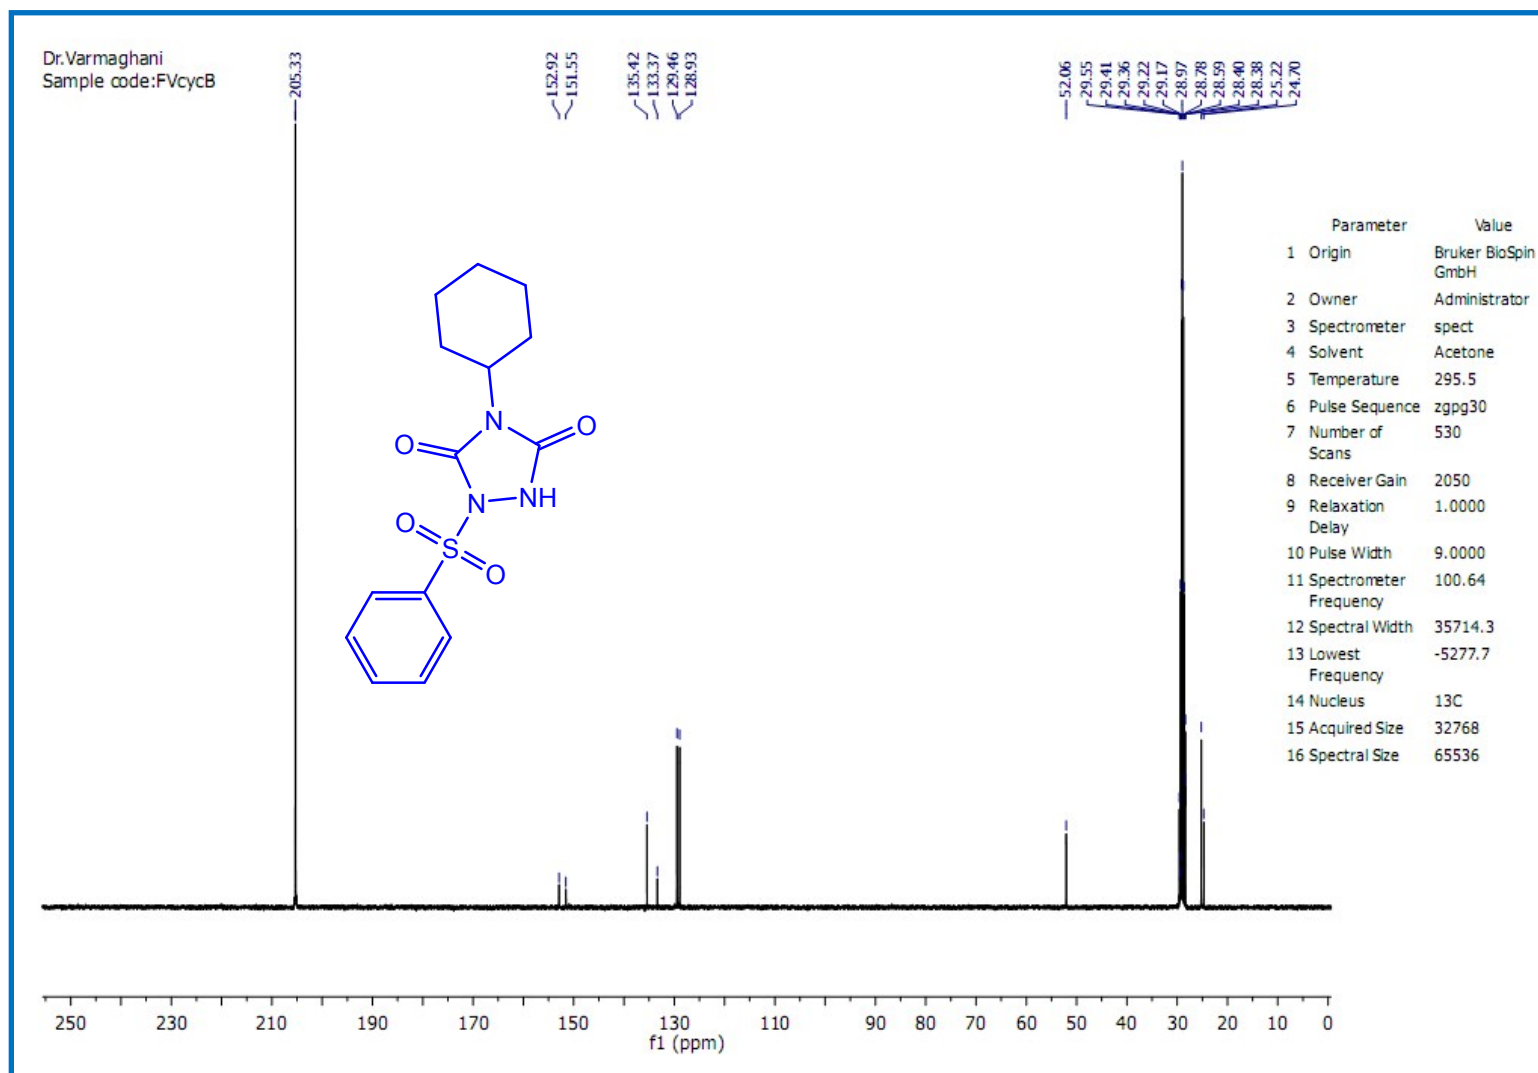

17. <sup>1</sup>H NMR spectrum of **2i**

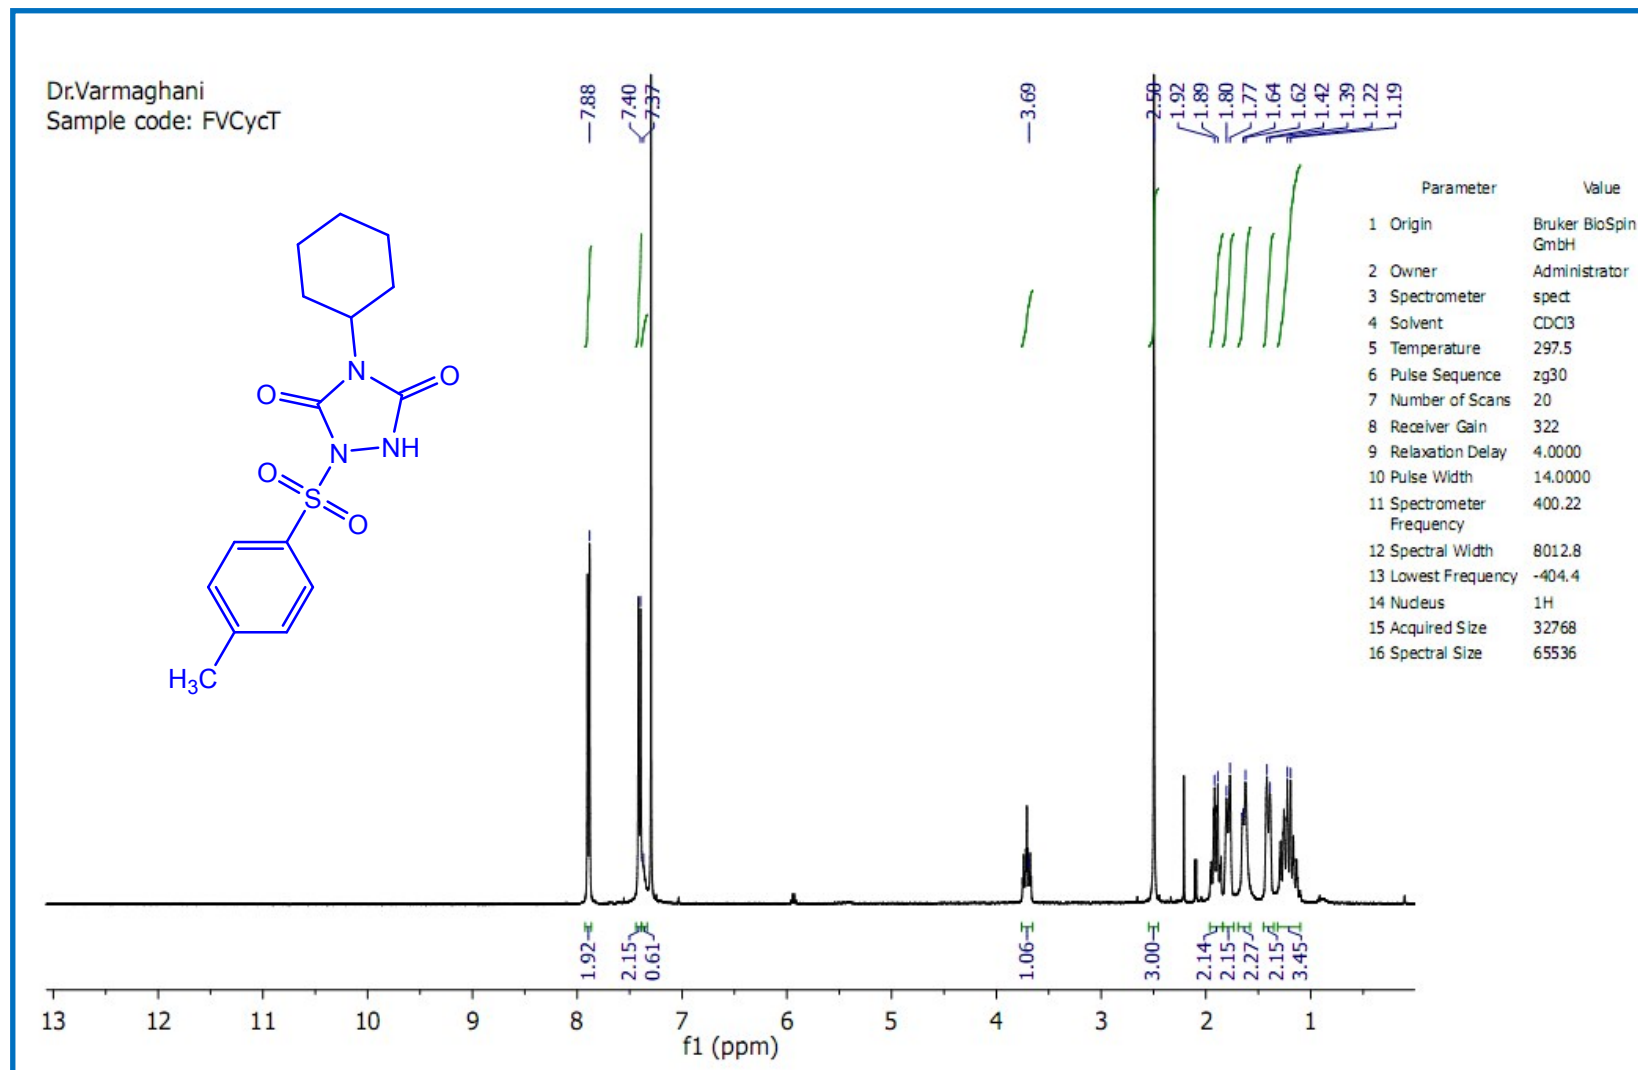

Dr.Varmaghani  
 Sample code: FVCycT

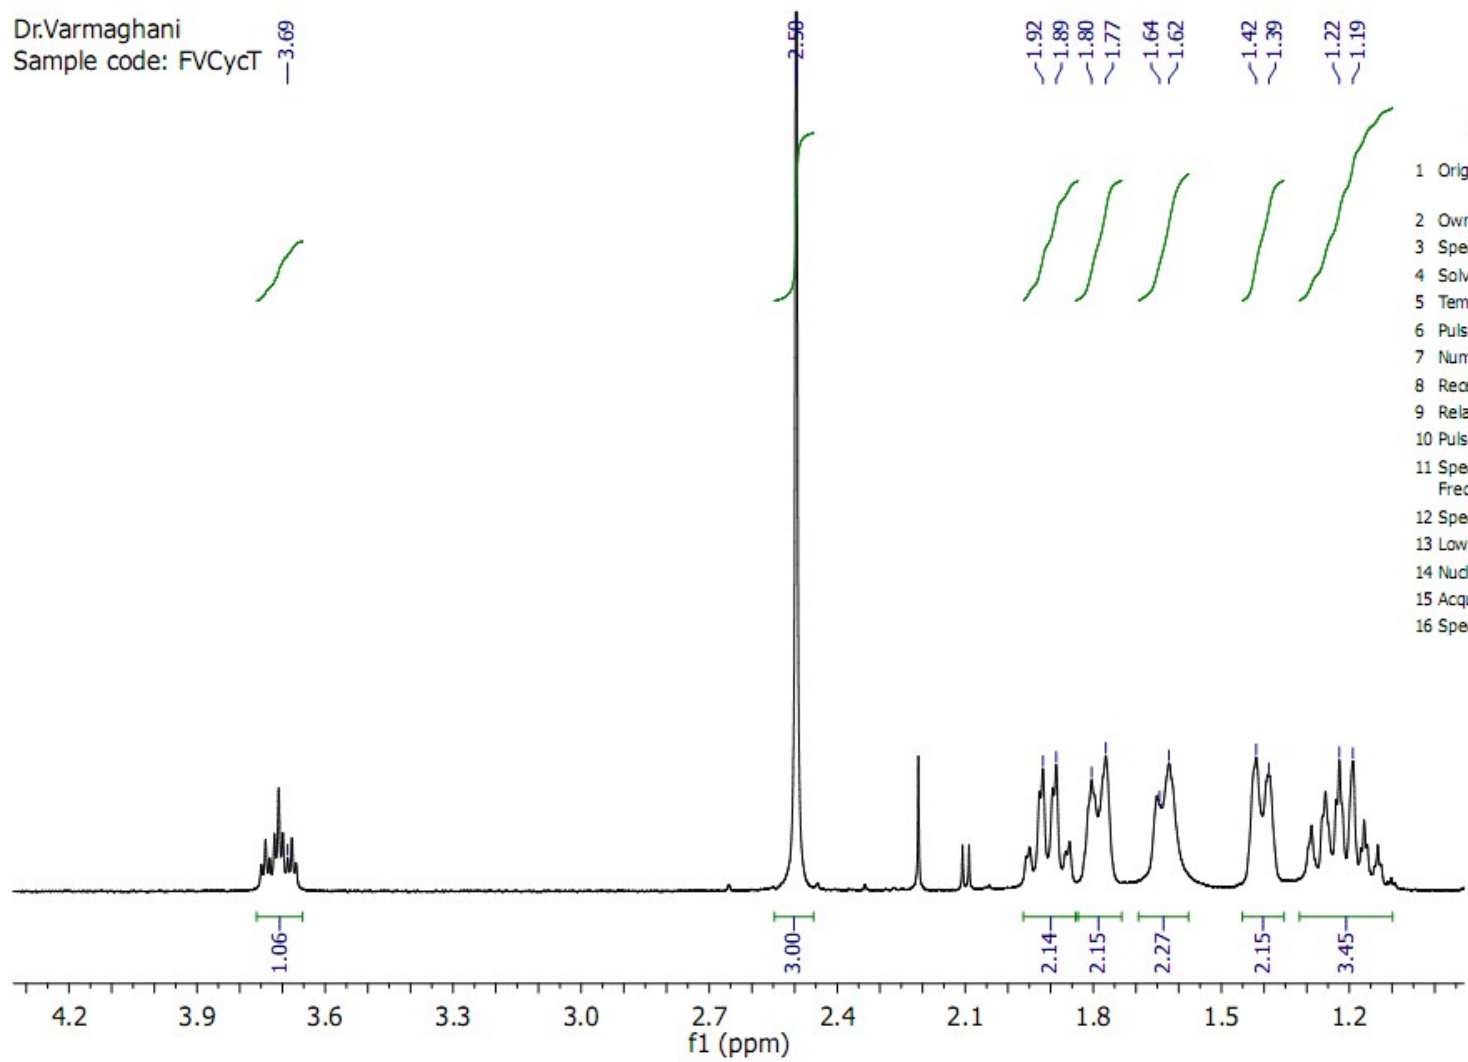

| Parameter                 | Value               |
|---------------------------|---------------------|
| 1 Origin                  | Bruker BioSpin GmbH |
| 2 Owner                   | Administrator       |
| 3 Spectrometer            | spect               |
| 4 Solvent                 | CDCl3               |
| 5 Temperature             | 297.5               |
| 6 Pulse Sequence          | zg30                |
| 7 Number of Scans         | 20                  |
| 8 Receiver Gain           | 322                 |
| 9 Relaxation Delay        | 4.0000              |
| 10 Pulse Width            | 14.0000             |
| 11 Spectrometer Frequency | 400.22              |
| 12 Spectral Width         | 8012.8              |
| 13 Lowest Frequency       | -404.4              |
| 14 Nucleus                | 1H                  |
| 15 Acquired Size          | 32768               |
| 16 Spectral Size          | 65536               |

Dr.Varmaghani  
Sample code: FVCycT

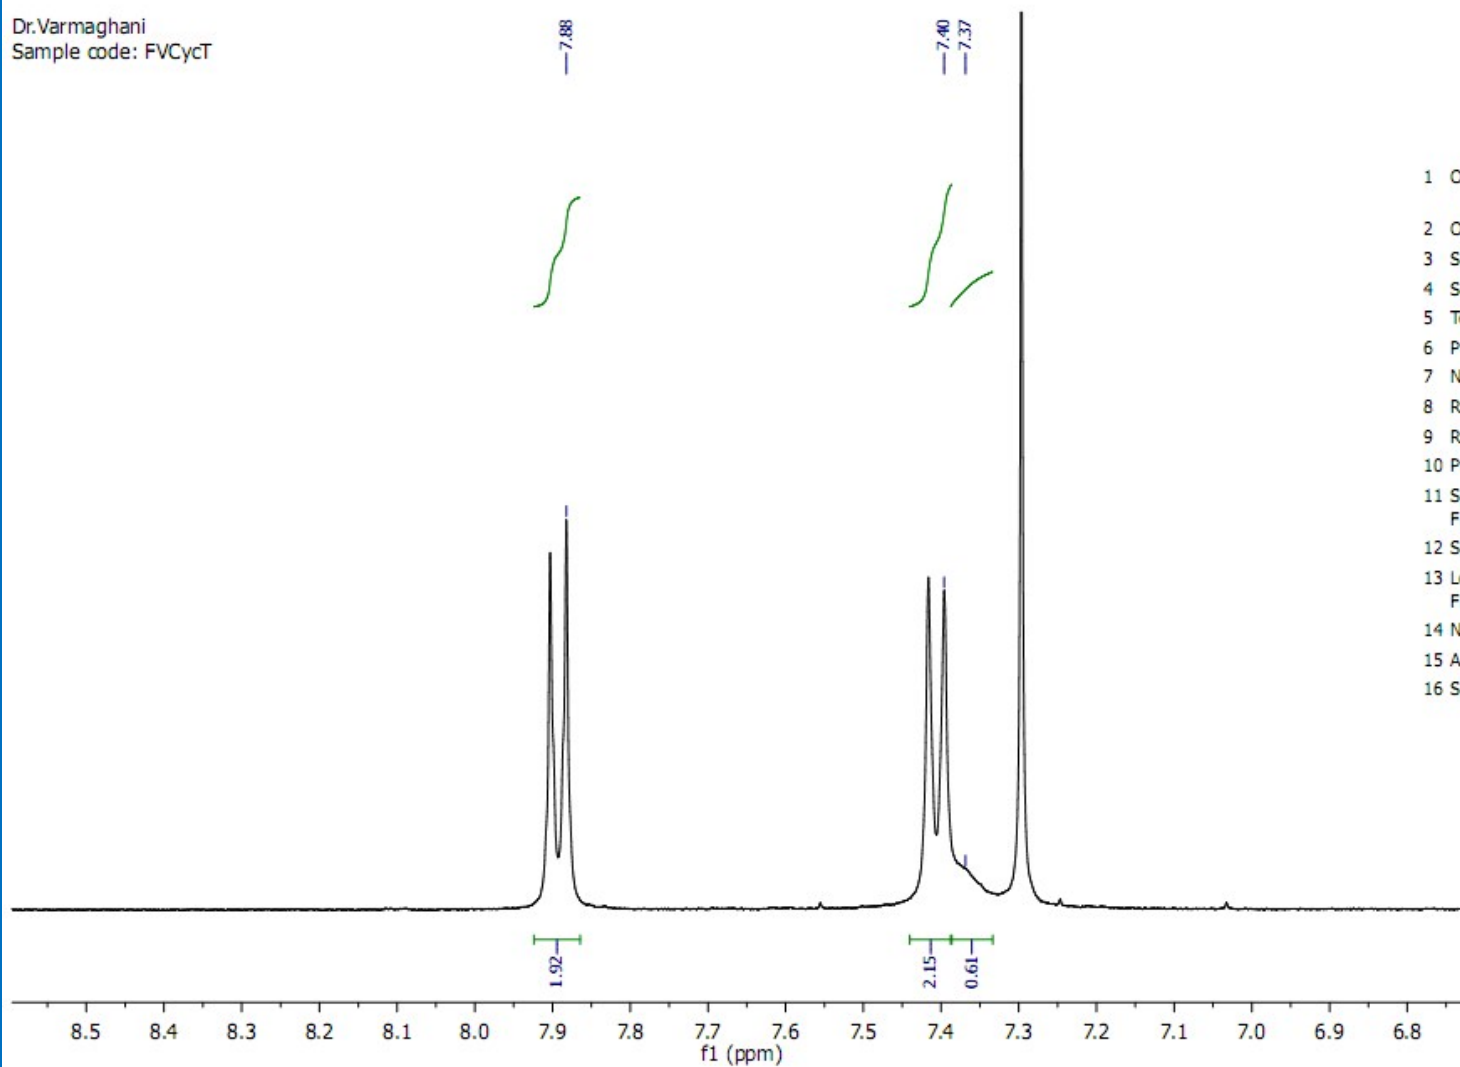

| Parameter                 | Value               |
|---------------------------|---------------------|
| 1 Origin                  | Bruker BioSpin GmbH |
| 2 Owner                   | Administrator       |
| 3 Spectrometer            | spect               |
| 4 Solvent                 | CDCl3               |
| 5 Temperature             | 297.5               |
| 6 Pulse Sequence          | zg30                |
| 7 Number of Scans         | 20                  |
| 8 Receiver Gain           | 322                 |
| 9 Relaxation Delay        | 4.0000              |
| 10 Pulse Width            | 14.0000             |
| 11 Spectrometer Frequency | 400.22              |
| 12 Spectral Width         | 8012.8              |
| 13 Lowest Frequency       | -404.4              |
| 14 Nucleus                | 1H                  |
| 15 Acquired Size          | 32768               |
| 16 Spectral Size          | 65536               |



18. <sup>13</sup>C NMR spectrum of **2i**

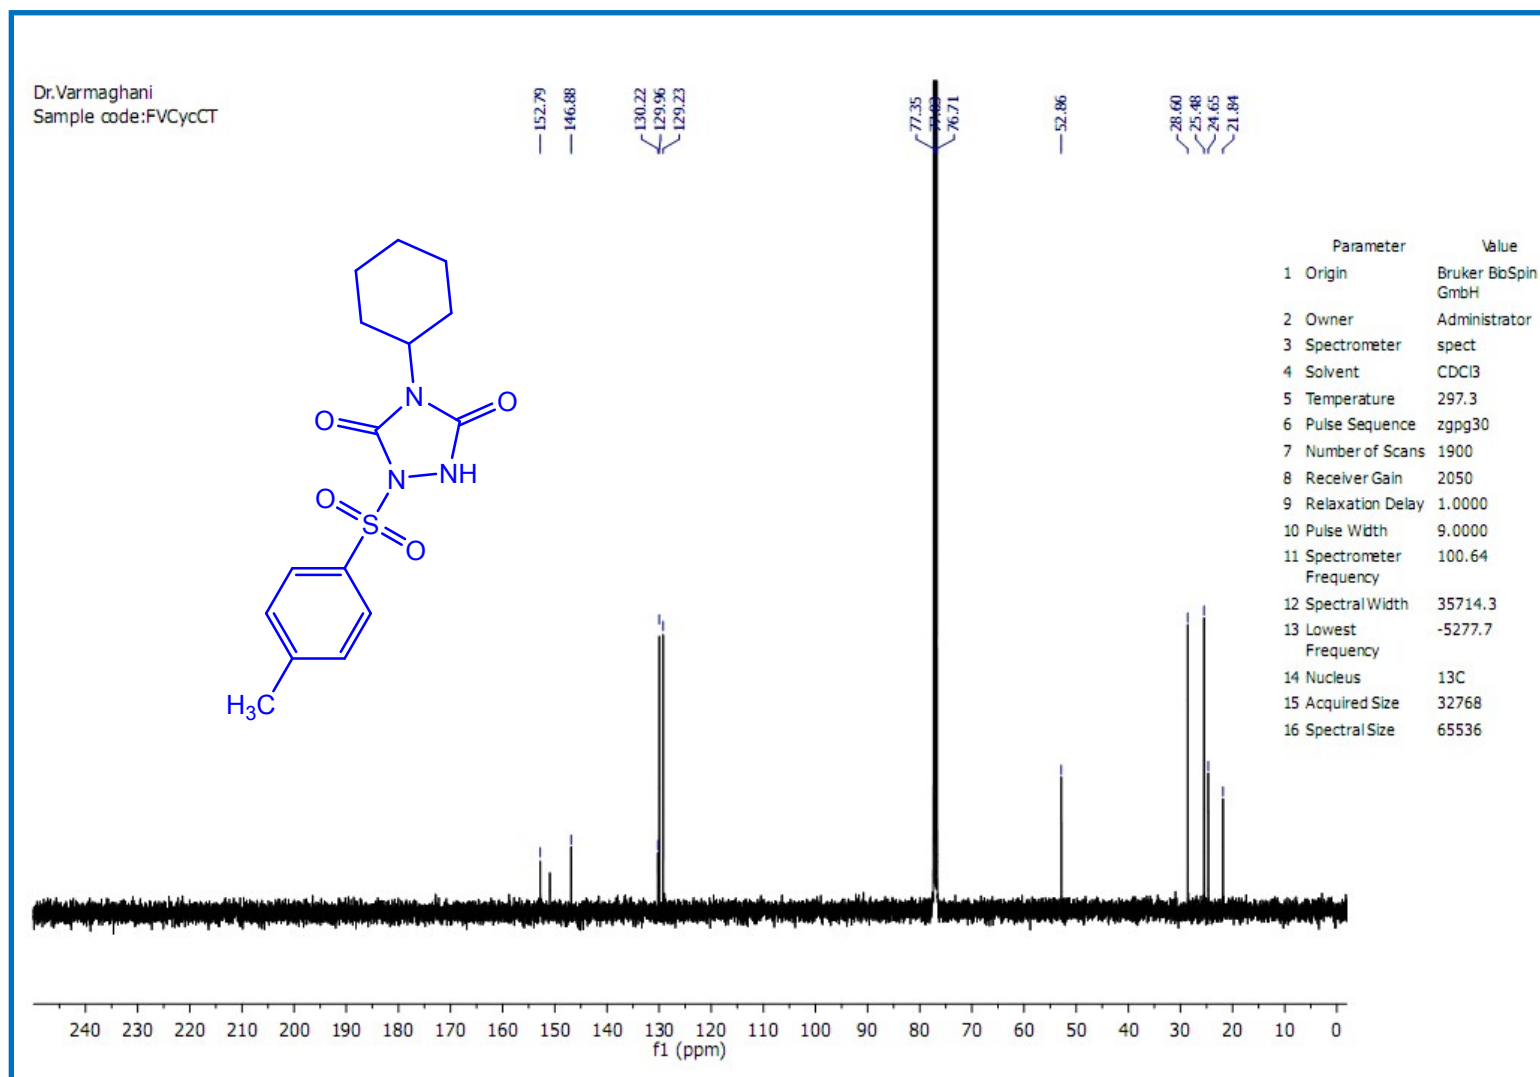

Supplement: c7nj01188a1.pdf [file c7nj01188a1.pdf]
